# Supplementary material for: Long Non-Coding RNAs Differentially Expressed between Normal versus Primary Breast Tumor Tissues Disclose Converse Changes to Breast Cancer-Related Protein-Coding Genes
Source: PubMed Central journal article supplement (PMC4180073; doi:10.1371/journal.pone.0106076), 2014-09-29
Supplement: pone.0106076.s004.pdf [file pone.0106076.s004.pdf]

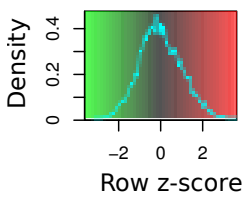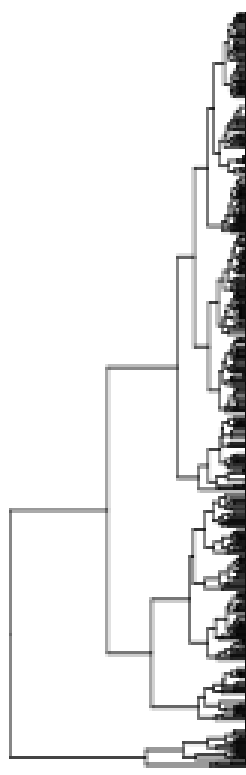

Normal (RP\_046)  
 Normal (RP\_026)  
 Normal (RP\_045)  
 Normal (RP\_066)  
 Normal (RP\_038)  
 NI (MicMa-627)  
 ERBB2 (MicMa-146)  
 BI (MicMa-067)  
 LB (MicMa-148)  
 BI (MicMa-267)  
 BI (MicMa-031)  
 BI (MicMa-042)  
 NI (MicMa-034)  
 NI (MicMa-451)  
 LA (MicMa-101)  
 NI (MicMa-083)  
 ERBB2 (MicMa-057)  
 ERBB2 (MicMa-318)  
 ERBB2 (MicMa-185)  
 BI (MicMa-709)  
 BI (MicMa-088)  
 LB (MicMa-053)  
 LB (MicMa-091)  
 NI (MicMa-020)  
 LA (MicMa-065)  
 LB (MicMa-085)  
 ERBB2 (MicMa-079)  
 LB (MicMa-132)  
 LA (MicMa-632)  
 LA (MicMa-122)  
 LA (MicMa-263)

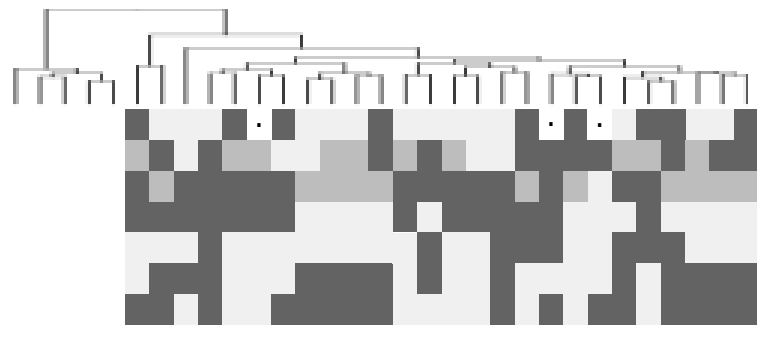

DTC  
 no yes n/a  
 Age  
 40 60  
 Grade  
 1 2 3  
 TP53  
 wt mut  
 Her2  
 neg pos  
 PR  
 neg pos  
 ER  
 neg pos
