# Supplementary material for: Long Non-Coding RNAs Differentially Expressed between Normal versus Primary Breast Tumor Tissues Disclose Converse Changes to Breast Cancer-Related Protein-Coding Genes
Source: PubMed Central journal article supplement (PMC4180073; doi:10.1371/journal.pone.0106076), 2014-09-29
Supplement: pone.0106076.s005.pdf [file pone.0106076.s005.pdf]

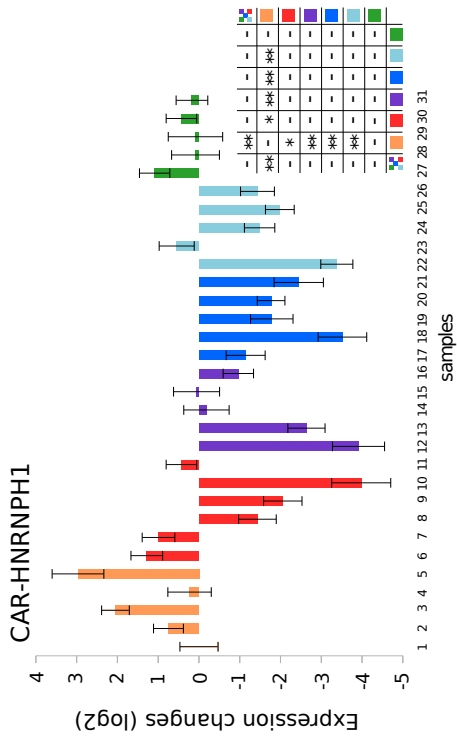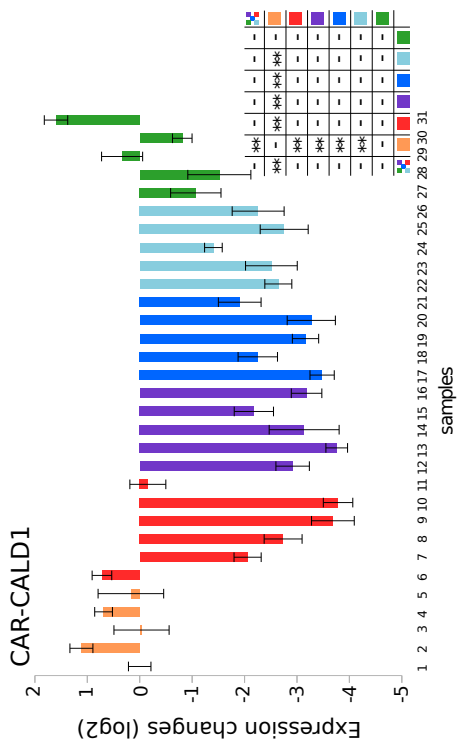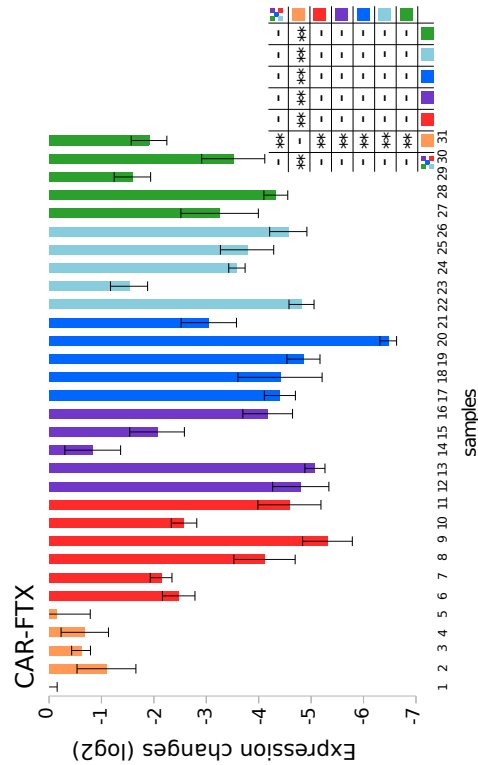

|        |            |       |           |           |             |                            |                |
|--------|------------|-------|-----------|-----------|-------------|----------------------------|----------------|
| Normal | Basal-like | ERBB2 | Luminal A | Luminal B | Normal-like | **                         | p-value < 0.01 |
|        |            |       |           |           | *           | p-value < 0.05             |                |
|        |            |       |           |           | -           | not significant/not tested |                |
