# Supplementary material for: Long Non-Coding RNAs Differentially Expressed between Normal versus Primary Breast Tumor Tissues Disclose Converse Changes to Breast Cancer-Related Protein-Coding Genes
Source: PubMed Central journal article supplement (PMC4180073; doi:10.1371/journal.pone.0106076), 2014-09-29

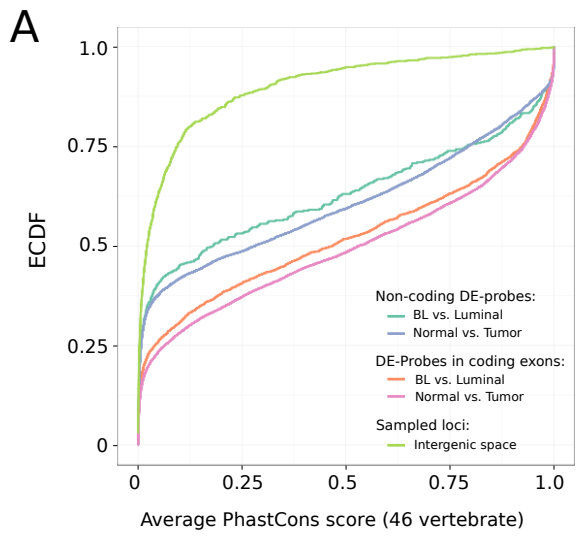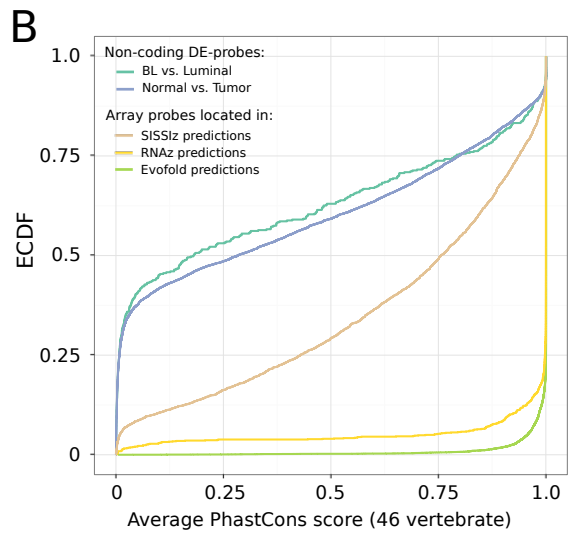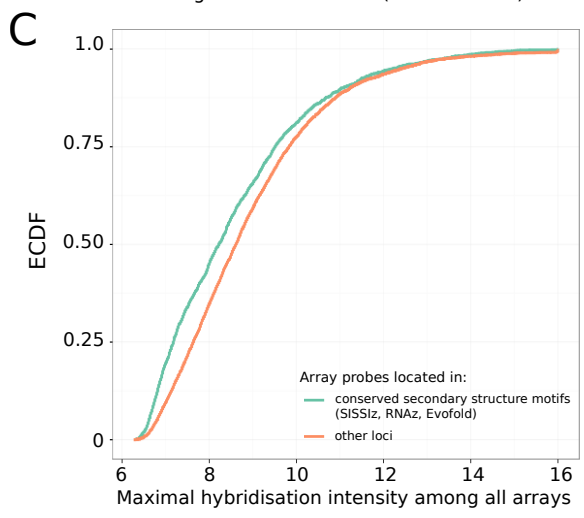

Supplement: pone.0106076.s006.pdf [file pone.0106076.s006.pdf]
