# Supplementary material for: Long Non-Coding RNAs Differentially Expressed between Normal versus Primary Breast Tumor Tissues Disclose Converse Changes to Breast Cancer-Related Protein-Coding Genes
Source: PubMed Central journal article supplement (PMC4180073; doi:10.1371/journal.pone.0106076), 2014-09-29
Supplement: pone.0106076.s008.pdf [file pone.0106076.s008.pdf]

| Sample ID | Age  | TCC | Tumor Size | Tumor Status | Histology | Grade | ER Status | PR Status | HER2 combined | TP53 Status | DTC Status | Subtype |       |
|-----------|------|-----|------------|--------------|-----------|-------|-----------|-----------|---------------|-------------|------------|---------|-------|
|           |      |     |            |              |           |       |           |           |               |             |            | PAM50   | Tumor |
| MicMa020  | 64.0 | 0.3 | 1.0        | 1            | 3         | 2     | 0         | 0         | 0             | 0           | 1          | 3       | 5     |
| MicMa031  | 43.0 | 0.9 | 1.0        | 1            | 2         | 3     | 0         | 0         | 0             | 1           | n/a        | 4       | 4     |
| MicMa034  | 39.0 | 0.2 | 1.3        | 1            | 2         | 2     | 1         | 1         | 0             | 0           | 0          | 5       | 5     |
| MicMa042  | 36.0 | 0.6 | 1.4        | 1            | 2         | 3     | 1         | 0         | 0             | 1           | 1          | 4       | 4     |
| MicMa053  | 63.1 | 1.0 | 4.0        | 2            | 1         | 2     | 0         | 0         | 1             | 1           | 1          | 3       | 3     |
| MicMa057  | 43.1 | 1.0 | 2.5        | 2            | 1         | 3     | 0         | 0         | 0             | 1           | 0          | 3       | 3     |
| MicMa065  | 73.2 | 0.6 | 2.0        | 1            | 1         | 1     | 1         | 0         | 0             | 0           | n/a        | 1       | 1     |
| MicMa067  | 39.2 | 1.0 | 2.7        | 2            | 1         | 3     | 0         | 1         | 0             | 1           | 0          | 4       | 4     |
| MicMa079  | 47.3 | 1.0 | 4.0        | 4            | 1         | 3     | 0         | 0         | 1             | 1           | 1          | 3       | 3     |
| MicMa083  | 69.3 | 0.7 | 4.0        | 2            | 2         | 2     | 1         | 1         | 0             | 0           | 1          | 5       | 5     |
| MicMa085  | 46.3 | 0.9 | 4.5        | 2            | 1         | 3     | 1         | 1         | 1             | 0           | 0          | 2       | 2     |
| MicMa088  | 33.3 | 0.9 | 3.5        | 2            | 1         | 3     | 1         | 1         | 1             | 1           | 0          | 3       | 2     |
| MicMa091  | 65.4 | 1.0 | 3.0        | 2            | 2         | 3     | 1         | 0         | 1             | 1           | n/a        | 4       | 2     |
| MicMa101  | 42.4 | 0.6 | 2.4        | 2            | 1         | 2     | 1         | 1         | 0             | 0           | 0          | 5       | 1     |
| MicMa122  | 76.5 | 0.9 | 1.5        | 1            | 1         | 2     | 1         | 1         | 0             | 0           | 0          | 1       | 1     |
| MicMa132  | 69.6 | 0.2 | 3.0        | 2            | 1         | 2     | 1         | 1         | 1             | 0           | 1          | 3       | 2     |
| MicMa146  | 72.6 | 0.6 | 3.5        | 2            | 1         | 2     | 1         | 1         | 0             | 1           | 0          | 3       | 3     |
| MicMa148  | 67.6 | 1.0 | 3.2        | 2            | 1         | 3     | 1         | 1         | 1             | 1           | 0          | 2       | 2     |
| MicMa185  | 54.7 | 0.8 | 2.1        | 2            | 1         | 3     | 0         | 0         | 0             | 1           | 0          | 4       | 4     |
| MicMa263  | 71.0 | 0.5 | n/a        | n/a          | 1         | 2     | 1         | 1         | 0             | 0           | 1          | 1       | 1     |
| MicMa267  | 51.0 | 1.0 | n/a        | n/a          | 1         | 3     | 0         | 0         | 0             | 1           | 1          | 4       | 4     |
| MicMa318  | 72.3 | 0.8 | 2.0        | 1            | 1         | 3     | 0         | 1         | 1             | 0           | 0          | 3       | 3     |
| MicMa451  | 50.7 | n/a | n/a        | 1            | 1         | 2     | 1         | 1         | 0             | 0           | 0          | 5       | 5     |

| Sample ID | Age  | TCC | Tumor Size | Tumor Status | Histology | Grade | ER Status | PR Status | HER2 combined | TP53 Status | DTC Status | Subtype |       |
|-----------|------|-----|------------|--------------|-----------|-------|-----------|-----------|---------------|-------------|------------|---------|-------|
|           |      |     |            |              |           |       |           |           |               |             |            | PAM50   | Tumor |
| MicMa627  | 49.2 | 0.6 | 5.5        | 3            | 1         | 3     | 1         | 0         | 0             | 1           | 1          | 5       | 5     |
| MicMa632  | 56.3 | 0.9 | 6.0        | 3            | 1         | 2     | 1         | 1         | 0             | 0           | 0          | 2       | 1     |
| MicMa709  | 32.5 | 0.6 | 2.5        | 2            | 1         | 3     | 0         | 0         | 0             | 1           | 0          | 4       | 4     |
