# Supplementary material for: Long Non-Coding RNAs Differentially Expressed between Normal versus Primary Breast Tumor Tissues Disclose Converse Changes to Breast Cancer-Related Protein-Coding Genes
Source: PubMed Central journal article supplement (PMC4180073; doi:10.1371/journal.pone.0106076), 2014-09-29
Supplement: pone.0106076.s009.pdf [file pone.0106076.s009.pdf]

| ID             | P-value | Odds ratio | Exp. count | Count  | Size | Pathway Name | Genes                                                                                                                                                                                                                                                                                                                                                                                                                                                 |
|----------------|---------|------------|------------|--------|------|--------------|-------------------------------------------------------------------------------------------------------------------------------------------------------------------------------------------------------------------------------------------------------------------------------------------------------------------------------------------------------------------------------------------------------------------------------------------------------|
| Normal > Tumor |         |            |            |        |      |              |                                                                                                                                                                                                                                                                                                                                                                                                                                                       |
| 1              | 04510   | 2.425E-07  | 2.599      | 36.387 | 63   | 125          | Focal adhesion<br>ACTN4, ACTN1, BIRC2, BRAF, CAV1, CAV2, CCND2, CCND3, COL4A1, COL6A1, COL6A2, CRK, CTNNB1, EGF, FLNA, FLNB, FLNC, FLT4, ARHGAP35, GSK3B, IGF1, IGFIR, ILK, ITGA2, ITGA9, ITGB1, ITGB4, ITGB8, JUN, KDR, LAMA3, LAMA4, LAMB1, LAMB3, LAMC1, LAMC2, MET, MYLK, PPP1R12A, PDGFRA, PDGFRB, PIK3R1, PPP1CA, PPP1CC, MAPK10, PTEN, PXN, RAC1, RAC2, SOS1, THBS3, THBS4, TLN1, VCL, VEGFC, ROCK2, AKT3, MYL9, SHC2, PDGFC, TNN, PDGFD, TLN2 |
| 2              | 04360   | 8.701E-06  | 2.708      | 24.161 | 43   | 83           | Axon guidance<br>ABL1, CFL2, DPYSL2, EFNA5, EFNB2, EFNB3, EPHA4, EPHB1, EPHB3, EPHB4, FES, GNAI2, GSK3B, ITGB1, ABLIM1, LIMK2, MET, NCK1, NFATC3, NFATC4, PLXNB1, PPP3CA, PPP3CB, RAC1, RAC2, RGS3, CXCL12, SLIT3, NCK2, SEMA5A, SLIT2, NTN1, ROCK2, SRGAP3, SEMA4D, SEMA4B, NFAT5, ARHGEF12, PLXNB2, NTN4, ROBO3, SEMA6D, SEMA3D                                                                                                                     |
| 3              | 04520   | 2.378E-05  | 3.545      | 13.391 | 27   | 46           | Adherens junction<br>ACTN4, ACTN1, CSNK2A1, CTNNB1, CTNND1, EP300, FGFR1, IGFIR, INSR, SMAD2, MET, MLLT4, PTPRF, PTPRM, PVRL1, RAC1, RAC2, SNAI2, TCF7, TCF7L2, TGFBR2, TJPI, VCL, IQGAP1, SORBS1, PARD3, PVRL4                                                                                                                                                                                                                                       |
| 4              | 04310   | 8.783E-05  | 2.231      | 29.110 | 47   | 100          | Wnt signaling pathway<br>APC, CAMK2B, CAMK2G, CCND2, CCND3, CSNK1A1, CSNK1E, CSNK2A1, CTBP1, CTNNB1, DVL1, DVL3, EP300, FZD2, GSK3B, JUN, LRP6, LRP5, SMAD2, MYC, NFATC3, NFATC4, PPAR, PPP2R1B, PPP2R5C, PPP3CA, PPP3CB, PRKACB, MAPK10, PSEN1, RAC1, RAC2, SFRP1, TCF7, TCF7L2, TP53, FZD5, AXIN2, FZD4, FZD7, BTRC, ROCK2, APC2, NFAT5, DAAM2, WNT5B, PRICKLE2                                                                                     |

| ID | P-value   | Odds ratio | Exp. count | Count | Size | Pathway Name                     | Genes                                                                                                                                                                                                                                                                                                                                                                                                                                                                                                                                                                                  |
|----|-----------|------------|------------|-------|------|----------------------------------|----------------------------------------------------------------------------------------------------------------------------------------------------------------------------------------------------------------------------------------------------------------------------------------------------------------------------------------------------------------------------------------------------------------------------------------------------------------------------------------------------------------------------------------------------------------------------------------|
| 5  | 1.994E-04 | 1.705      | 63.168     | 87    | 217  | Pathways in cancer               | ABL1, APC, BIRC2, FAS, ARNT, BRAF, CASP9, RUNX1, RUNX1T1, CBL, CBLB, CDK6, CEBPA, COL4A1, CRK, CTBP1, CTNNB1, DVL1, DVL3, EGF, EP300, EPAS1, ETS1, FGF1, FGF2, FGFR1, FGFR2, FOXO1, FOS, MTOR, FZD2, GLI3, GSK3B, IGF1, IGF1R, IKKKB, ITGA2, ITGB1, JUN, JUP, KIT, LAMA3, LAMA4, LAMB1, LAMB3, LAMC1, LAMC2, SMAD2, MET, MYC, PDGFRA, PDGFRB, PIK3R1, PLCG1, PLD1, PPARG, PPARG, MAPK10, PTCH1, PTEN, RAC1, RAC2, RXRB, RXRG, SMO, SOS1, STAT3, STAT5B, TCF7, TCF7L2, TGFBR2, TP53, VEGFC, ZBTB16, FZD5, AXIN2, FZD4, FZD7, PIAS2, AKT3, APC2, PIAS3, DAPK2, APPL1, SUFU, EGLN1, WNT5B |
| 6  | 0.4810    | 2.539E-04  | 35.805     | 54    | 123  | Regulation of actin cytoskeleton | ACTN4, ACTN1, APC, BDKRB2, BRAF, CFL2, CRK, DIAPH2, EGF, FGF1, FGF2, FGFR1, FGFR2, FGFR4, ARHGAP35, GSN, ITGA2, ITGA9, ITGB1, ITGB4, ITGB8, LIMK2, MSN, MYH9, MYH10, MYLK, PPP1R12A, PDGFRA, PDGFRB, PIK3R1, PPP1CA, PPP1CC, PXN, RAC1, RAC2, RRAS, SOS1, TMSB4X, VCL, PIP4K2B, IQGAP1, ARHGEF7, ARHGEF6, ROCK2, ARPC4, ABI2, APC2, MYL9, MRAS, CYFIP1, ARHGEF12, SSH1, PDGFC, PDGFD                                                                                                                                                                                                   |
| 7  | 0.5217    | 5.569E-04  | 9.606      | 19    | 33   | Basal cell carcinoma             | APC, CTNNB1, DVL1, DVL3, FZD2, GLI3, GSK3B, PTCH1, SMO, TCF7, TCF7L2, TP53, FZD5, AXIN2, FZD4, FZD7, APC2, SUFU, WNT5B                                                                                                                                                                                                                                                                                                                                                                                                                                                                 |
| 8  | 0.00310   | 1.135E-03  | 9.315      | 18    | 32   | Lysine degradation               | ACAT1, ALDH2, ALDH7A1, GCDH, HADHA, OGDH, SETMAR, BBOX1, PLOD3, SETDB1, EHMT2, SETD2, SUV420H1, WHSC1L1, ASH1L, NSD1, EHMT1, SETD7                                                                                                                                                                                                                                                                                                                                                                                                                                                     |
| 9  | 0.03040   | 1.698E-03  | 20.959     | 33    | 72   | Spliceosome                      | HNRNPK, NHP2L1, PCBP1, PLRGI, SRSF1, SRSF2, SRSF3, SRSF4, SRSF5, TRA2B, SNRNP70, DDX39B, DHX16, SART1, SNRNP40, DHX38, SF3A1, CHERP, SLU7, PRPF8, TCERG1, DDX42, U2AF2, NCBP2, ACIN1, U2SURP, SF3B1, SYF2, RBMX, PRPF38B, XAB2, RBM25, PRPF38A                                                                                                                                                                                                                                                                                                                                         |

| ID | P-value | Odds ratio | Exp. count | Count  | Size | Pathway Name | Genes                           |                                                                                                                                                                                                                                                                                                                                                                                                              |
|----|---------|------------|------------|--------|------|--------------|---------------------------------|--------------------------------------------------------------------------------------------------------------------------------------------------------------------------------------------------------------------------------------------------------------------------------------------------------------------------------------------------------------------------------------------------------------|
| 10 | 03320   | 5.359E-03  | 2.621      | 9.606  | 17   | 33           | PPAR signaling pathway          | CPT1A, ILK, LPL, PLIN1, PLTP, PPARA, PPARC, PPARL, PPARG, RXRB, RXRG, SCD, UBC, ADIPOQ, NRIH3, SORBS1, ANGPTL4, SLC27A1                                                                                                                                                                                                                                                                                      |
| 11 | 04530   | 5.779E-03  | 1.923      | 20.668 | 31   | 71           | Tight junction                  | ACTN4, ACTN1, CSNK2A1, CTNNB1, EPB41L1, EPB41L2, GNAI2, MLLT4, MYH9, MYH10, MYH11, CLDN11, PPP2R1B, PRKCH, PTEN, RRAS, SPTAN1, TJPI, CLDN5, VAPA, MAGI1, TJP2, AKT3, MYL9, EXOC3, MRAS, PPP2R2D, ASH1L, PARD3, JAM3, AMOTL1                                                                                                                                                                                  |
| 12 | 05213   | 1.567E-02  | 2.204      | 10.480 | 17   | 36           | Endometrial cancer              | APC, BRAF, CASP9, CTNNB1, EGF, GSK3B, ILK, MYC, PIK3R1, PTEN, SOS1, TCF7, TCF7L2, TP53, AXIN2, AKT3, APC2                                                                                                                                                                                                                                                                                                    |
| 13 | 05215   | 1.578E-02  | 1.836      | 17.757 | 26   | 61           | Prostate cancer                 | BRAF, CASP9, CTNNB1, EGF, EP300, FGFR1, FGFR2, FOXO1, MTOR, GSK3B, IGF1, IGF1R, IKBKB, PDGFRA, PDGFRB, PIK3R1, PTEN, SOS1, TCF7, TCF7L2, TP53, CREB5, AKT3, PDGFC, CREB3L2, PDGFD                                                                                                                                                                                                                            |
| 14 | 04920   | 2.134E-02  | 2.093      | 10.771 | 17   | 37           | Adipocytokine signaling pathway | CPT1A, MTOR, IKBKB, IRS1, PPARA, PRKAB1, MAPK10, RXRB, RXRG, STAT3, IRS2, SOCS3, ADIPOQ, AKT3, CAMKK2, ADIPOR2, CAMKK1                                                                                                                                                                                                                                                                                       |
| 15 | 05221   | 3.009E-02  | 1.926      | 11.935 | 18   | 41           | Acute myeloid leukemia          | BRAF, RUNX1, RUNX1T1, CEBPA, MTOR, IKBKB, JUP, KIT, MYC, PIK3R1, PPARG, SOS1, STAT3, STAT5B, TCF7, TCF7L2, ZBTB16, AKT3                                                                                                                                                                                                                                                                                      |
| 16 | 05210   | 3.386E-02  | 1.784      | 14.555 | 21   | 50           | Colorectal cancer               | APC, BRAF, CASP9, CTNNB1, FOS, GSK3B, JUN, SMAD2, MYC, PIK3R1, MAPK10, RAC1, RAC2, TCF7, TCF7L2, TGFBR2, TP53, AXIN2, AKT3, APC2, APPL1                                                                                                                                                                                                                                                                      |
| 17 | 04010   | 3.486E-02  | 1.388      | 46.285 | 57   | 159          | MAPK signaling pathway          | FAS, BRAF, CRK, DUSP1, DUSP3, DUSP6, EGF, ELK4, FGF1, FGF2, FGFR1, FGFR2, FGFR4, FLNA, FLNB, FLNC, FOS, NR4A1, IKBKB, JUN, JUND, MEF2C, MAP3K4, MYC, NFATC4, NTF3, NTRK2, PDGFRA, PDGFRB, PPM1A, PPM1B, PPP3CA, PPP3CB, PRKACB, MAPK10, MAP2K7, RAC1, RAC2, RASA2, RRAS, SOS1, SRF, TGFBR2, TP53, MAPKAPK5, JMJD7-PLA2G4B, RPS6KA4, TAOK2, AKT3, RASGRP2, MRAS, TAB2, MAPK8IP3, TAOK3, DUSP22, TAOK1, CACNG7 |

| ID | P-value | Odds ratio | Exp. count | Count  | Size | Pathway Name | Genes                                                                                                                                                                                                                                                                                                             |
|----|---------|------------|------------|--------|------|--------------|-------------------------------------------------------------------------------------------------------------------------------------------------------------------------------------------------------------------------------------------------------------------------------------------------------------------|
| 18 | 04340   | 3.828E-02  | 2.129      | 8.151  | 13   | 28           | Hedgehog signaling pathway<br>BMP6, CSNK1A1, CSNK1D, CSNK1E, GAS1, GLI3, GSK3B, PRKACB, PTCHI, SMO, BTRC, SUFU, WNT5B                                                                                                                                                                                             |
| 19 | 04512   | 4.230E-02  | 1.723      | 14.846 | 21   | 51           | ECM-receptor interaction<br>CD47, COL4A1, COL6A1, COL6A2, DAG1, ITGA2, ITGA9, ITGB1, ITGB4, ITGB8, LAMA3, LAMA4, LAMBI, LAMB3, LAMC1, LAMC2, THBS3, THBS4, SDC3, TNN, AGRN                                                                                                                                        |
| 20 | 04722   | 4.506E-02  | 1.509      | 25.326 | 33   | 87           | Neurotrophin signaling pathway<br>ABL1, BRAF, CALM1, CAMK2B, CAMK2G, CRK, GAB1, GSK3B, IKKB, IRS1, JUN, NGFR, NTF3, NTRK2, PIK3R1, PLCG1, MAPK10, MAP2K7, PSEN1, RAC1, SOS1, TP53, YWHAB, YWHAG, IRS2, RPS6KA4, AKT3, SH2B3, ZNF274, PRDM4, SHC2, SH2B1, KIDINS220                                                |
| 21 | 04630   | 4.524E-02  | 1.585      | 20.086 | 27   | 69           | Jak-STAT signaling pathway<br>CBL, CBLB, CCND2, CCND3, EP300, EPOR, GHR, IFNARI, IFNGR1, LIFR, MYC, PIK3R1, SOS1, STAT2, STAT3, STAT5B, STAT6, TYK2, SOCS2, SOCS3, PIAS2, AKT3, SPRY1, SPRY2, PIAS3, IL20RA, SOCS4                                                                                                |
| 22 | 04144   | 4.834E-02  | 1.423      | 33.476 | 42   | 115          | Endocytosis<br>ADRBK2, AP2A2, CAV1, CAV2, CBL, CBLB, DAB2, DNMI, DNMI2, EGF, EPS15, FGFR2, FGFR4, FOLR1, FOLR2, IGF1R, KDR, KIT, SMAD2, MET, PDGFRA, PLD1, TGFB2, GIT2, IQSEC1, VPS45, RAB11FIP2, NEDD4L, PSD4, VPS4A, CHMP2A, SH3KBP1, EHD4, ASAPI, VPS36, ARFGAP1, PAR3, SH3GLB2, VPS37B, RUFY1, FAM125B, ARAPI |
| 23 | 05412   | 4.915E-02  | 1.770      | 12.517 | 18   | 43           | Arrhythmogenic right ventricular cardiomyopathy (ARVC)<br>ACTN4, ACTN1, CTNNB1, DAG1, DMD, DSG2, ITGA2, ITGA9, ITGB1, ITGB4, ITGB8, JUP, LMNA, SGCB, SGCD, TCF7, TCF7L2, CACNG7                                                                                                                                   |

Normal < Tumor

|   |       |           |       |        |    |    |                                                                                                                                                                                                                                                                                                                                                                                               |
|---|-------|-----------|-------|--------|----|----|-----------------------------------------------------------------------------------------------------------------------------------------------------------------------------------------------------------------------------------------------------------------------------------------------------------------------------------------------------------------------------------------------|
| 1 | 05322 | 5.945E-07 | 3.376 | 15.964 | 35 | 75 | Systemic lupus erythematosus<br>C2, HIST1H2AE, H2AFX, H2AFX, HIST1H2BB, HLA-DQB1, HIST1H2AK, HIST1H2AL, HIST1H2AC, HIST1H2AB, HIST1H2AM, HIST1H2BG, HIST1H2BL, HIST1H2BM, HIST1H2BH, HIST1H2BI, HIST1H2BC, HIST1H2BO, HIST1H3A, HIST1H3D, HIST1H3C, HIST1H3E, HIST1H3I, HIST1H3G, HIST1H3J, HIST1H3H, HIST1H3B, HIST1H4A, HIST1H4F, HIST1H4L, HIST1H3F, HIST1H2AG, HIST1H2BJ, H2AFJ, HIST3H2A |
|---|-------|-----------|-------|--------|----|----|-----------------------------------------------------------------------------------------------------------------------------------------------------------------------------------------------------------------------------------------------------------------------------------------------------------------------------------------------------------------------------------------------|

| ID | P-value | Odds ratio | Exp. count | Count | Size | Pathway Name                            | Genes                                                                                                                                                                                                                   |
|----|---------|------------|------------|-------|------|-----------------------------------------|-------------------------------------------------------------------------------------------------------------------------------------------------------------------------------------------------------------------------|
| 2  | 04260   | 3.025E-05  | 8.301      | 20    | 39   | Cardiac muscle contraction              | ACTC1, ATP1A1, ATP1B2, CACNA1C, CACNA1S, CACNB1, COX6B1, COX6C, COX7A2, COX7B, COX8A, MYH6, TNNC1, TNNT3, COX7A2L, CACNA2D2, UQCRCQ, CACNG4, UQCRI0, CACNG7                                                             |
| 3  | 04110   | 2.044E-04  | 17.667     | 32    | 83   | Cell cycle                              | BUB1B, CCNA2, CCNB1, CCNE1, CDK1, CDC6, CDC25A, CDC25B, CDC25C, CDK2, CDKN1A, CDKN2A, E2F1, E2F5, GSK3B, MAD2L1, MCM2, MCM3, MCM4, MDM2, PCNA, PLK1, PRKDC, TTK, YWHAG, SMC1A, PKMYT1, CCNB2, CCNE2, BUB3, ORC6, CCNB3  |
| 4  | 00190   | 6.830E-04  | 12.771     | 24    | 60   | Oxidative phosphorylation               | ATP5G3, ATP6V1A, ATP6V1E1, ATP5O, COX6B1, COX6C, COX7A2, COX7B, COX8A, NDUFA2, NDUFA6, NDUFB2, NDUFB9, NDUFS1, NDUFS8, COX7A2L, ATP5L, UQCRCQ, UQCRI0, ATP6V1H, NDUFB11, NDUFA12, ATP6V1C2, NDUFS7                      |
| 5  | 05012   | 4.765E-03  | 12.132     | 21    | 57   | Parkinson's disease                     | ATP5G3, ATP5O, CASP3, COX6B1, COX6C, COX7A2, COX7B, COX8A, NDUFA2, NDUFA6, NDUFB2, NDUFB9, NDUFS1, NDUFS8, TH, COX7A2L, UQCRCQ, UQCRI0, NDUFB11, NDUFA12, NDUFS7                                                        |
| 6  | 04914   | 2.145E-02  | 11.281     | 18    | 53   | Progesterone-mediated oocyte maturation | ARAF, CCNA2, CCNB1, CDK1, CDC25A, CDC25B, CDC25C, CDK2, GNAI2, IGF1, MAD2L1, PLK1, MAPK13, RPS6KA2, PKMYT1, CCNB2, PIK3R5, CCNB3                                                                                        |
| 7  | 05010   | 2.682E-02  | 19.795     | 28    | 93   | Alzheimer's disease                     | ATP5G3, ATP5O, CACNA1C, CACNA1S, CALM2, CASP3, COX6B1, COX6C, COX7A2, COX7B, COX8A, GSK3B, LRP1, NDUFA2, NDUFA6, NDUFB2, NDUFB9, NDUFS1, NDUFS8, NOS1, COX7A2L, NCSTN, UQCRCQ, UQCRI0, NDUFB11, PSENEN, NDUFA12, NDUFS7 |
| 8  | 05016   | 2.682E-02  | 19.795     | 28    | 93   | Huntington's disease                    | ATP5G3, ATP5O, BDNF, CASP3, CLTC, COX6B1, COX6C, COX7A2, COX7B, COX8A, NDUFA2, NDUFA6, NDUFB2, NDUFB9, NDUFS1, NDUFS8, POLR2K, TAF4, TGM2, COX7A2L, DCTN2, RCOR1, UQCRCQ, UQCRI0, NDUFB11, NDUFA12, CREB3L4, NDUFS7     |

| ID | P-value | Odds ratio | Exp. count | Count  | Size | Pathway Name | Genes                                    |                                                                                                                                                                                                |
|----|---------|------------|------------|--------|------|--------------|------------------------------------------|------------------------------------------------------------------------------------------------------------------------------------------------------------------------------------------------|
| 9  | 04114   | 3.423E-02  | 1.686      | 15.112 | 22   | 71           | Oocyte meiosis                           | AR, CALM2, CCNB1, CCNE1, CDK1, CDC25C, CDK2, IGF1, MAD2L1, PLK1, PPP2CA, PPP2R5B, PPP2R5D, RPS6KA2, AURKA, YWHAG, SMC1A, PKMYT1, CCNB2, CCNE2, FBXO5, SGOL1                                    |
| 10 | 04080   | 3.994E-02  | 1.549      | 20.434 | 28   | 96           | Neuroactive ligand-receptor inter-action | TSPO, C5ARI, CHRM1, CHRM2, CHRNE, LTB4R, DRD1, DRD2, DRD3, GABRA1, NPBWR1, GRIA1, GRIK5, GRM2, GRM7, OPRL1, PPYR1, PRSS3, SSTR1, TACR2, THRA, TRHR, TSHB, CYSLTR1, HRH3, NTSR2, GRIN3A, GPR156 |
