# Supplementary material for: Long Non-Coding RNAs Differentially Expressed between Normal versus Primary Breast Tumor Tissues Disclose Converse Changes to Breast Cancer-Related Protein-Coding Genes
Source: PubMed Central journal article supplement (PMC4180073; doi:10.1371/journal.pone.0106076), 2014-09-29
Supplement: pone.0106076.s011.pdf [file pone.0106076.s011.pdf]

| Annotation                                                             | Survey         | Fisher's exact test |           |              | overlap   |       | no overlap |        |
|------------------------------------------------------------------------|----------------|---------------------|-----------|--------------|-----------|-------|------------|--------|
|                                                                        |                | Odds ratio          | P-value   | 95% CI       | DE-Probes | BG    | DE-Probes  | BG     |
| Overlap with protein coding genes and intergenic space (all DE-probes) |                |                     |           |              |           |       |            |        |
| Normal vs. Tumor                                                       |                |                     |           |              |           |       |            |        |
| CDS<br>(antisense)                                                     | Normal > Tumor | 0.86                | 1.87e-02  | [0.76, 0.98] | 259       | 6159  | 9497       | 194434 |
|                                                                        | Normal < Tumor | 2.06                | 3.40e-56  | [1.90, 2.24] | 665       | 6159  | 10182      | 194434 |
| CDS<br>(sense)                                                         | Normal > Tumor | 3.96                | 0.00e+00  | [3.76, 4.16] | 2229      | 13972 | 7527       | 186621 |
|                                                                        | Normal < Tumor | 1.29                | 1.17e-12  | [1.21, 1.38] | 957       | 13972 | 9890       | 186621 |
| intergenic                                                             | Normal > Tumor | 0.27                | 0.00e+00  | [0.25, 0.28] | 992       | 59919 | 8764       | 140674 |
|                                                                        | Normal < Tumor | 0.91                | 5.65e-06  | [0.87, 0.95] | 3019      | 59919 | 7828       | 140674 |
| introns<br>(antisense)                                                 | Normal > Tumor | 0.32                | 9.74e-267 | [0.29, 0.34] | 739       | 41391 | 9017       | 159202 |
|                                                                        | Normal < Tumor | 0.91                | 3.06e-04  | [0.87, 0.96] | 2083      | 41391 | 8764       | 159202 |
| introns<br>(sense)                                                     | Normal > Tumor | 0.99                | 5.94e-01  | [0.94, 1.04] | 1909      | 39702 | 7847       | 160891 |
|                                                                        | Normal < Tumor | 0.72                | 9.27e-35  | [0.68, 0.76] | 1640      | 39702 | 9207       | 160891 |
| 3'UTRs<br>(antisense)                                                  | Normal > Tumor | 0.53                | 2.52e-31  | [0.47, 0.60] | 300       | 11280 | 9456       | 189313 |
|                                                                        | Normal < Tumor | 1.29                | 1.97e-10  | [1.19, 1.39] | 773       | 11280 | 10074      | 189313 |
| 3'UTRs<br>(sense)                                                      | Normal > Tumor | 3.44                | 0.00e+00  | [3.29, 3.60] | 3159      | 24480 | 6597       | 176113 |
|                                                                        | Normal < Tumor | 1.17                | 8.30e-08  | [1.10, 1.24] | 1515      | 24480 | 9332       | 176113 |
| 5'UTRs<br>(antisense)                                                  | Normal > Tumor | 0.77                | 6.77e-02  | [0.56, 1.02] | 48        | 1288  | 9708       | 199305 |
|                                                                        | Normal < Tumor | 2.04                | 2.69e-13  | [1.70, 2.43] | 141       | 1288  | 10706      | 199305 |
| 5'UTRs<br>(sense)                                                      | Normal > Tumor | 2.60                | 1.32e-30  | [2.24, 3.01] | 209       | 1673  | 9547       | 198920 |
|                                                                        | Normal < Tumor | 1.69                | 9.51e-09  | [1.42, 2.00] | 152       | 1673  | 10695      | 198920 |
| Basal-like vs. Luminal Tumors                                          |                |                     |           |              |           |       |            |        |
| CDS<br>(antisense)                                                     | BL > Luminal   | 2.49                | 1.44e-24  | [2.12, 2.91] | 176       | 6159  | 2230       | 194434 |
|                                                                        | BL < Luminal   | 1.66                | 1.37e-03  | [1.21, 2.22] | 48        | 6159  | 914        | 194434 |
| CDS<br>(sense)                                                         | BL > Luminal   | 5.97                | 6.39e-263 | [5.46, 6.52] | 743       | 13972 | 1663       | 186621 |
|                                                                        | BL < Luminal   | 2.99                | 2.58e-31  | [2.52, 3.53] | 176       | 13972 | 786        | 186621 |
| intergenic                                                             | BL > Luminal   | 0.12                | 3.38e-208 | [0.10, 0.15] | 120       | 59919 | 2286       | 140674 |
|                                                                        | BL < Luminal   | 0.52                | 8.68e-17  | [0.44, 0.61] | 174       | 59919 | 788        | 140674 |
| introns<br>(antisense)                                                 | BL > Luminal   | 0.22                | 2.07e-99  | [0.18, 0.26] | 129       | 41391 | 2277       | 159202 |
|                                                                        | BL < Luminal   | 0.49                | 1.55e-14  | [0.39, 0.60] | 108       | 41391 | 854        | 159202 |
| introns<br>(sense)                                                     | BL > Luminal   | 0.22                | 2.39e-95  | [0.18, 0.26] | 123       | 39702 | 2283       | 160891 |
|                                                                        | BL < Luminal   | 0.54                | 3.90e-11  | [0.44, 0.66] | 113       | 39702 | 849        | 160891 |
| 3'UTRs<br>(antisense)                                                  | BL > Luminal   | 1.17                | 6.16e-02  | [0.99, 1.38] | 157       | 11280 | 2249       | 189313 |
|                                                                        | BL < Luminal   | 1.10                | 4.83e-01  | [0.83, 1.43] | 59        | 11280 | 903        | 189313 |
| 3'UTRs<br>(sense)                                                      | BL > Luminal   | 5.20                | 4.21e-288 | [4.79, 5.65] | 1010      | 24480 | 1396       | 176113 |
|                                                                        | BL < Luminal   | 2.98                | 5.03e-45  | [2.59, 3.44] | 282       | 24480 | 680        | 176113 |
| 5'UTRs<br>(antisense)                                                  | BL > Luminal   | 0.58                | 1.20e-01  | [0.26, 1.11] | 9         | 1288  | 2397       | 199305 |
|                                                                        | BL < Luminal   | 1.13                | 6.83e-01  | [0.45, 2.35] | 7         | 1288  | 955        | 199305 |
| 5'UTRs<br>(sense)                                                      | BL > Luminal   | 1.45                | 5.48e-02  | [0.97, 2.10] | 29        | 1673  | 2377       | 198920 |
|                                                                        | BL < Luminal   | 1.76                | 4.76e-02  | [0.95, 2.97] | 14        | 1673  | 948        | 198920 |
| Overlap with known non-coding RNAs (non-coding DE-probes)              |                |                     |           |              |           |       |            |        |
| Normal vs. Tumor                                                       |                |                     |           |              |           |       |            |        |

| Annotation                    | Survey         | Fisher's exact test |          |              | overlap   |      | no overlap |        |
|-------------------------------|----------------|---------------------|----------|--------------|-----------|------|------------|--------|
|                               |                | Odds ratio          | P-value  | 95% CI       | DE-Probes | BG   | DE-Probes  | BG     |
| CARs                          | Normal > Tumor | 5.75                | 8.22e-95 | [4.99, 6.60] | 250       | 2073 | 2574       | 122732 |
|                               | Normal < Tumor | 0.84                | 1.39e-01 | [0.67, 1.06] | 81        | 2073 | 5685       | 122732 |
| Evofold                       | Normal > Tumor | 0.36                | 6.00e-22 | [0.27, 0.46] | 65        | 7726 | 2759       | 117079 |
|                               | Normal < Tumor | 0.32                | 2.11e-48 | [0.27, 0.39] | 120       | 7726 | 5646       | 117079 |
| lincRNAs                      | Normal > Tumor | 2.81                | 1.24e-13 | [2.18, 3.57] | 73        | 1167 | 2751       | 123638 |
|                               | Normal < Tumor | 0.91                | 5.74e-01 | [0.67, 1.21] | 49        | 1167 | 5717       | 123638 |
| lncRNAdb                      | Normal > Tumor | 10.09               | 3.88e-47 | [7.78,12.95] | 79        | 355  | 2745       | 124450 |
|                               | Normal < Tumor | 0.61                | 1.26e-01 | [0.29, 1.13] | 10        | 355  | 5756       | 124450 |
| lncRNAs<br>(Gencode)          | Normal > Tumor | 1.81                | 1.60e-03 | [1.24, 2.56] | 34        | 834  | 2790       | 123971 |
|                               | Normal < Tumor | 1.38                | 2.67e-02 | [1.02, 1.82] | 53        | 834  | 5713       | 123971 |
| PINs                          | Normal > Tumor | 3.69                | 2.16e-10 | [2.55, 5.20] | 36        | 435  | 2788       | 124370 |
|                               | Normal < Tumor | 0.70                | 2.05e-01 | [0.38, 1.18] | 14        | 435  | 5752       | 124370 |
| RNAz                          | Normal > Tumor | 0.97                | 1.00e+00 | [0.56, 1.57] | 17        | 773  | 2807       | 124032 |
|                               | Normal < Tumor | 0.45                | 4.65e-04 | [0.25, 0.73] | 16        | 773  | 5750       | 124032 |
| miRNAs                        | Normal > Tumor | 0.94                | 1.00e+00 | [0.30, 2.22] | 5         | 236  | 2819       | 124569 |
|                               | Normal < Tumor | 1.19                | 5.34e-01 | [0.63, 2.08] | 13        | 236  | 5753       | 124569 |
| snoRNAs or<br>scaRNAs         | Normal > Tumor | 3.65                | 4.29e-08 | [2.37, 5.42] | 27        | 329  | 2797       | 124476 |
|                               | Normal < Tumor | 4.92                | 2.63e-25 | [3.76, 6.36] | 74        | 329  | 5692       | 124476 |
| SISSlz                        | Normal > Tumor | 1.01                | 9.39e-01 | [0.73, 1.36] | 45        | 1976 | 2779       | 122829 |
|                               | Normal < Tumor | 1.51                | 1.11e-05 | [1.26, 1.80] | 137       | 1976 | 5629       | 122829 |
| TINs                          | Normal > Tumor | 2.28                | 4.41e-14 | [1.87, 2.77] | 114       | 2260 | 2710       | 122545 |
|                               | Normal < Tumor | 0.80                | 4.78e-02 | [0.64, 1.00] | 84        | 2260 | 5682       | 122545 |
| TUCP                          | Normal > Tumor | 4.58                | 4.02e-13 | [3.16, 6.44] | 37        | 361  | 2787       | 124444 |
|                               | Normal < Tumor | 0.72                | 3.12e-01 | [0.37, 1.27] | 12        | 361  | 5754       | 124444 |
| Basal-like vs. Luminal Tumors |                |                     |          |              |           |      |            |        |
| CARs                          | BL > Luminal   | 0.37                | 5.31e-01 | [0.01, 2.10] | 1         | 2073 | 162        | 122732 |
|                               | BL < Luminal   | 1.90                | 6.32e-02 | [0.86, 3.70] | 9         | 2073 | 281        | 122732 |
| Evofold                       | BL > Luminal   | 0.38                | 4.90e-02 | [0.10, 1.00] | 4         | 7726 | 159        | 117079 |
|                               | BL < Luminal   | 0.60                | 1.11e-01 | [0.29, 1.10] | 11        | 7726 | 279        | 117079 |
| lincRNAs                      | BL > Luminal   | 1.32                | 6.67e-01 | [0.16, 4.80] | 2         | 1167 | 161        | 123638 |
|                               | BL < Luminal   | 1.11                | 7.55e-01 | [0.23, 3.30] | 3         | 1167 | 287        | 123638 |
| lncRNAdb                      | BL > Luminal   | 11.09               | 1.20e-04 | [3.53,26.70] | 5         | 355  | 158        | 124450 |
|                               | BL < Luminal   | 0.00                | 1.00e+00 | [0.00, 4.50] | 0         | 355  | 290        | 124450 |
| lncRNAs<br>(Gencode)          | BL > Luminal   | 6.67                | 1.31e-04 | [2.63,14.10] | 7         | 834  | 156        | 123971 |
|                               | BL < Luminal   | 1.03                | 7.21e-01 | [0.12, 3.80] | 2         | 834  | 288        | 123971 |
| PINs                          | BL > Luminal   | 0.00                | 1.00e+00 | [0.00, 6.60] | 0         | 435  | 163        | 124370 |
|                               | BL < Luminal   | 0.99                | 1.00e+00 | [0.02, 5.60] | 1         | 435  | 289        | 124370 |
| RNAz                          | BL > Luminal   | 3.01                | 8.19e-02 | [0.61, 9.00] | 3         | 773  | 160        | 124032 |
|                               | BL < Luminal   | 1.11                | 7.02e-01 | [0.13, 4.10] | 2         | 773  | 288        | 124032 |
| miRNAs                        | BL > Luminal   | 0.00                | 1.00e+00 | [0.00,12.20] | 0         | 236  | 163        | 124569 |
|                               | BL < Luminal   | 0.00                | 1.00e+00 | [0.00, 6.80] | 0         | 236  | 290        | 124569 |
| snoRNAs or<br>scaRNAs         | BL > Luminal   | 7.09                | 9.63e-03 | [1.44,21.30] | 3         | 329  | 160        | 124476 |
|                               | BL < Luminal   | 2.63                | 1.79e-01 | [0.32, 9.70] | 2         | 329  | 288        | 124476 |
| SISSlz                        | BL > Luminal   | 0.00                | 1.92e-01 | [0.00, 1.40] | 0         | 1976 | 163        | 122829 |
|                               | BL < Luminal   | 1.99                | 5.32e-02 | [0.90, 3.80] | 9         | 1976 | 281        | 122829 |

| Annotation                                                                                                          | Survey         | Fisher's exact test |           |              | overlap   |       | no overlap |        |
|---------------------------------------------------------------------------------------------------------------------|----------------|---------------------|-----------|--------------|-----------|-------|------------|--------|
|                                                                                                                     |                | Odds ratio          | P-value   | 95% CI       | DE-Probes | BG    | DE-Probes  | BG     |
| TINs                                                                                                                | BL > Luminal   | 3.54                | 8.60e-04  | [1.66, 6.70] | 10        | 2260  | 153        | 122545 |
|                                                                                                                     | BL < Luminal   | 0.38                | 1.86e-01  | [0.05, 1.40] | 2         | 2260  | 288        | 122545 |
| TUCP                                                                                                                | BL > Luminal   | 4.28                | 8.19e-02  | [0.51,15.80] | 2         | 361   | 161        | 124444 |
|                                                                                                                     | BL < Luminal   | 1.19                | 5.69e-01  | [0.03, 6.70] | 1         | 361   | 289        | 124444 |
| Overlap with known non-coding RNAs regulated during cell cycle, upon TP53 or Stat3 induction (non-coding DE-probes) |                |                     |           |              |           |       |            |        |
| Normal vs. Tumor                                                                                                    |                |                     |           |              |           |       |            |        |
| CC<br>(intergenic)                                                                                                  | Normal > Tumor | 2.75                | 7.14e-06  | [1.79, 4.06] | 27        | 437   | 2797       | 124368 |
|                                                                                                                     | Normal < Tumor | 0.59                | 8.28e-02  | [0.30, 1.05] | 12        | 437   | 5754       | 124368 |
| CC<br>(intron)                                                                                                      | Normal > Tumor | 2.15                | 1.13e-12  | [1.76, 2.60] | 116       | 2440  | 2708       | 122365 |
|                                                                                                                     | Normal < Tumor | 0.63                | 4.45e-05  | [0.49, 0.79] | 71        | 2440  | 5695       | 122365 |
| P53<br>(intergenic)                                                                                                 | Normal > Tumor | 3.33                | 7.85e-12  | [2.42, 4.48] | 48        | 645   | 2776       | 124160 |
|                                                                                                                     | Normal < Tumor | 1.01                | 9.25e-01  | [0.67, 1.45] | 30        | 645   | 5736       | 124160 |
| P53<br>(intron)                                                                                                     | Normal > Tumor | 2.41                | 5.33e-40  | [2.14, 2.72] | 328       | 6445  | 2496       | 118360 |
|                                                                                                                     | Normal < Tumor | 0.52                | 2.36e-18  | [0.44, 0.61] | 160       | 6445  | 5606       | 118360 |
| Stat3<br>(intergenic)                                                                                               | Normal > Tumor | 0.50                | 2.98e-01  | [0.10, 1.47] | 3         | 266   | 2821       | 124539 |
|                                                                                                                     | Normal < Tumor | 0.49                | 7.62e-02  | [0.18, 1.08] | 6         | 266   | 5760       | 124539 |
| Stat3<br>(intron)                                                                                                   | Normal > Tumor | 0.67                | 3.97e-01  | [0.24, 1.47] | 6         | 397   | 2818       | 124408 |
|                                                                                                                     | Normal < Tumor | 0.98                | 1.00e+00  | [0.58, 1.57] | 18        | 397   | 5748       | 124408 |
| Basal-like vs. Luminal Tumors                                                                                       |                |                     |           |              |           |       |            |        |
| CC<br>(intergenic)                                                                                                  | BL > Luminal   | 7.16                | 2.79e-03  | [1.92,18.80] | 4         | 437   | 159        | 124368 |
|                                                                                                                     | BL < Luminal   | 0.98                | 1.00e+00  | [0.03, 5.60] | 1         | 437   | 289        | 124368 |
| CC<br>(intron)                                                                                                      | BL > Luminal   | 1.92                | 1.42e-01  | [0.69, 4.30] | 6         | 2440  | 157        | 122365 |
|                                                                                                                     | BL < Luminal   | 1.42                | 2.87e-01  | [0.61, 2.80] | 8         | 2440  | 282        | 122365 |
| P53<br>(intergenic)                                                                                                 | BL > Luminal   | 11.25               | 2.44e-07  | [5.03,22.00] | 9         | 645   | 154        | 124160 |
|                                                                                                                     | BL < Luminal   | 0.67                | 1.00e+00  | [0.02, 3.80] | 1         | 645   | 289        | 124160 |
| P53<br>(intron)                                                                                                     | BL > Luminal   | 3.33                | 1.19e-06  | [2.08, 5.10] | 25        | 6445  | 138        | 118360 |
|                                                                                                                     | BL < Luminal   | 1.22                | 4.23e-01  | [0.71, 2.00] | 18        | 6445  | 272        | 118360 |
| Stat3<br>(intergenic)                                                                                               | BL > Luminal   | 0.00                | 1.00e+00  | [0.00,10.80] | 0         | 266   | 163        | 124539 |
|                                                                                                                     | BL < Luminal   | 1.62                | 4.62e-01  | [0.04, 9.20] | 1         | 266   | 289        | 124539 |
| Stat3<br>(intron)                                                                                                   | BL > Luminal   | 0.00                | 1.00e+00  | [0.00, 7.20] | 0         | 397   | 163        | 124408 |
|                                                                                                                     | BL < Luminal   | 2.18                | 2.37e-01  | [0.26, 8.00] | 2         | 397   | 288        | 124408 |
| Overlap with regulation tracks (non-coding DE-probes)                                                               |                |                     |           |              |           |       |            |        |
| Normal vs. Tumor                                                                                                    |                |                     |           |              |           |       |            |        |
| CpG                                                                                                                 | Normal > Tumor | 2.06                | 6.71e-08  | [1.60, 2.62] | 72        | 1565  | 2752       | 123240 |
|                                                                                                                     | Normal < Tumor | 2.92                | 5.06e-36  | [2.50, 3.38] | 206       | 1565  | 5560       | 123240 |
| CpG and<br>H3K4me3                                                                                                  | Normal > Tumor | 2.17                | 2.99e-08  | [1.67, 2.78] | 68        | 1402  | 2756       | 123403 |
|                                                                                                                     | Normal < Tumor | 2.95                | 1.82e-33  | [2.51, 3.45] | 187       | 1402  | 5579       | 123403 |
| DNaseI                                                                                                              | Normal > Tumor | 1.51                | 2.68e-24  | [1.39, 1.63] | 1041      | 34856 | 1783       | 89949  |
|                                                                                                                     | Normal < Tumor | 1.34                | 7.21e-24  | [1.26, 1.42] | 1969      | 34856 | 3797       | 89949  |
| H3K27ac                                                                                                             | Normal > Tumor | 2.81                | 7.82e-160 | [2.61, 3.04] | 1613      | 40108 | 1211       | 84697  |
|                                                                                                                     | Normal < Tumor | 1.34                | 9.55e-26  | [1.27, 1.42] | 2240      | 40108 | 3526       | 84697  |
| H3k27me3                                                                                                            | Normal > Tumor | 0.51                | 1.26e-63  | [0.48, 0.56] | 1616      | 90135 | 1208       | 34670  |
|                                                                                                                     | Normal < Tumor | 1.34                | 1.63e-20  | [1.26, 1.43] | 4480      | 90135 | 1286       | 34670  |

| Annotation                    | Survey         | Fisher's exact test |           |              | overlap   |       | no overlap |        |
|-------------------------------|----------------|---------------------|-----------|--------------|-----------|-------|------------|--------|
|                               |                | Odds ratio          | P-value   | 95% CI       | DE-Probes | BG    | DE-Probes  | BG     |
| H3K36me3                      | Normal > Tumor | 4.86                | 1.40e-243 | [4.35, 5.44] | 2458      | 72412 | 366        | 52393  |
|                               | Normal < Tumor | 1.01                | 8.06e-01  | [0.95, 1.06] | 3355      | 72412 | 2411       | 52393  |
| H3K4me1                       | Normal > Tumor | 2.43                | 6.65e-89  | [2.21, 2.68] | 2281      | 79050 | 543        | 45755  |
|                               | Normal < Tumor | 1.48                | 5.28e-41  | [1.39, 1.57] | 4144      | 79050 | 1622       | 45755  |
| H3K4me3                       | Normal > Tumor | 2.54                | 2.48e-124 | [2.36, 2.74] | 1304      | 31493 | 1520       | 93312  |
|                               | Normal < Tumor | 1.62                | 3.04e-62  | [1.53, 1.71] | 2039      | 31493 | 3727       | 93312  |
| Pol II                        | Normal > Tumor | 4.15                | 2.04e-279 | [3.84, 4.47] | 1389      | 23618 | 1435       | 101187 |
|                               | Normal < Tumor | 1.41                | 1.26e-26  | [1.33, 1.50] | 1428      | 23618 | 4338       | 101187 |
| TFBs<br>(Encode)              | Normal > Tumor | 1.76                | 1.82e-39  | [1.62, 1.91] | 869       | 25175 | 1955       | 99630  |
|                               | Normal < Tumor | 1.53                | 9.03e-43  | [1.44, 1.63] | 1609      | 25175 | 4157       | 99630  |
| Basal-like vs. Luminal Tumors |                |                     |           |              |           |       |            |        |
| CpG                           | BL > Luminal   | 1.48                | 4.63e-01  | [0.30, 4.40] | 3         | 1565  | 160        | 123240 |
|                               | BL < Luminal   | 2.23                | 3.17e-02  | [0.95, 4.47] | 8         | 1565  | 282        | 123240 |
| CpG and<br>H3K4me3            | BL > Luminal   | 1.65                | 4.36e-01  | [0.34, 4.92] | 3         | 1402  | 160        | 123403 |
|                               | BL < Luminal   | 2.18                | 4.76e-02  | [0.87, 4.56] | 7         | 1402  | 283        | 123403 |
| DNaseI                        | BL > Luminal   | 1.24                | 1.91e-01  | [0.88, 1.74] | 53        | 34856 | 110        | 89949  |
|                               | BL < Luminal   | 1.42                | 4.80e-03  | [1.11, 1.82] | 103       | 34856 | 187        | 89949  |
| H3K27ac                       | BL > Luminal   | 2.74                | 2.12e-10  | [1.99, 3.78] | 92        | 40108 | 71         | 84697  |
|                               | BL < Luminal   | 1.29                | 3.77e-02  | [1.01, 1.65] | 110       | 40108 | 180        | 84697  |
| H3k27me3                      | BL > Luminal   | 0.34                | 7.63e-12  | [0.24, 0.46] | 76        | 90135 | 87         | 34670  |
|                               | BL < Luminal   | 1.26                | 1.01e-01  | [0.95, 1.67] | 222       | 90135 | 68         | 34670  |
| H3K36me3                      | BL > Luminal   | 10.00               | 5.48e-24  | [5.43,20.45] | 152       | 72412 | 11         | 52393  |
|                               | BL < Luminal   | 1.07                | 5.92e-01  | [0.84, 1.36] | 173       | 72412 | 117        | 52393  |
| H3K4me1                       | BL > Luminal   | 2.37                | 2.88e-06  | [1.60, 3.61] | 131       | 79050 | 32         | 45755  |
|                               | BL < Luminal   | 1.13                | 3.29e-01  | [0.88, 1.46] | 192       | 79050 | 98         | 45755  |
| H3K4me3                       | BL > Luminal   | 1.82                | 3.90e-04  | [1.30, 2.52] | 62        | 31493 | 101        | 93312  |
|                               | BL < Luminal   | 1.23                | 1.19e-01  | [0.94, 1.59] | 85        | 31493 | 205        | 93312  |
| Pol II                        | BL > Luminal   | 4.23                | 9.39e-19  | [3.07, 5.83] | 81        | 23618 | 82         | 101187 |
|                               | BL < Luminal   | 1.41                | 1.31e-02  | [1.07, 1.86] | 72        | 23618 | 218        | 101187 |
| TFBs<br>(Encode)              | BL > Luminal   | 1.33                | 1.18e-01  | [0.91, 1.91] | 41        | 25175 | 122        | 99630  |
|                               | BL < Luminal   | 1.75                | 2.61e-05  | [1.35, 2.26] | 89        | 25175 | 201        | 99630  |
