# Supplementary material for: Long Non-Coding RNAs Differentially Expressed between Normal versus Primary Breast Tumor Tissues Disclose Converse Changes to Breast Cancer-Related Protein-Coding Genes
Source: PubMed Central journal article supplement (PMC4180073; doi:10.1371/journal.pone.0106076), 2014-09-29
Supplement: pone.0106076.s013.pdf [file pone.0106076.s013.pdf]

| ID                                                                          | P-value | Odds ratio | Exp. count | Count  | Size | Pathway Name | Genes                                                                                                                                                                                |
|-----------------------------------------------------------------------------|---------|------------|------------|--------|------|--------------|--------------------------------------------------------------------------------------------------------------------------------------------------------------------------------------|
| Non-coding DE-probe in intergenic space but proximal to protein-coding gene |         |            |            |        |      |              |                                                                                                                                                                                      |
| 1                                                                           | 05200   | 1.098E-05  | 3.086      | 10.048 | 25   | 217          | Pathways in cancer<br>AR, BCL2, RUNX1T1, CBLB, CTNNB1, ETS1, FGFR1, FOS, FZD2, GLI3, IGF1, ITGB1, KIT, MET, MMP9, PIK3R1, RARA, STAT3, TCF7, TCF7L2, WNT5A, ZBTB16, FZD4, FZD7, SUFU |
| 2                                                                           | 05217   | 1.110E-05  | 8.228      | 1.528  | 9    | 33           | Basal cell carcinoma<br>CTNNB1, FZD2, GLI3, TCF7, TCF7L2, WNT5A, FZD4, FZD7, SUFU                                                                                                    |
| 3                                                                           | 04916   | 2.435E-05  | 5.138      | 2.963  | 12   | 64           | Melanogenesis<br>CALM1, CTNNB1, EDN1, EDNRB, FZD2, GNAI2, KIT, TCF7, TCF7L2, WNT5A, FZD4, FZD7                                                                                       |
| 4                                                                           | 05221   | 4.461E-04  | 5.257      | 1.898  | 8    | 41           | Acute myeloid leukemia<br>RUNX1T1, KIT, PIK3R1, RARA, STAT3, TCF7, TCF7L2, ZBTB16                                                                                                    |
| 5                                                                           | 04520   | 1.002E-03  | 4.557      | 2.130  | 8    | 46           | Adherens junction<br>CTNNB1, FGFR1, MET, MLLT4, PVRL1, SRC, TCF7, TCF7L2                                                                                                             |
| 6                                                                           | 04360   | 1.272E-03  | 3.347      | 3.843  | 11   | 83           | Axon guidance<br>EFNA5, EFNB2, EPHA4, GNAI2, ITGB1, MET, CXCL12, SEMA5A, ROBO3, UNC5A, SEMA3D                                                                                        |
| 7                                                                           | 05412   | 3.094E-03  | 4.177      | 1.991  | 7    | 43           | Arrhythmic right ventricular cardiomyopathy (ARVC)<br>CTNNB1, ITGA5, ITGB1, SGCA, TCF7, TCF7L2, CACNG4                                                                               |
| 8                                                                           | 05100   | 4.578E-03  | 3.852      | 2.130  | 7    | 46           | Bacterial invasion of epithelial cells<br>CBLB, CTNNB1, ITGA5, ITGB1, MET, PIK3R1, SRC                                                                                               |
| 9                                                                           | 04670   | 4.609E-03  | 3.447      | 2.686  | 8    | 58           | Leukocyte transendothelial migration<br>CTNNB1, GNAI2, ITGB1, MLLT4, MMP9, PIK3R1, MAPK13, CXCL12                                                                                    |
| 10                                                                          | 05215   | 6.301E-03  | 3.248      | 2.824  | 8    | 61           | Prostate cancer<br>AR, BCL2, CTNNB1, FGFR1, IGF1, PIK3R1, TCF7, TCF7L2                                                                                                               |
| 11                                                                          | 04950   | 2.426E-02  | 5.727      | 0.648  | 3    | 14           | Maturity onset diabetes of the young<br>FOXA2, FOXA3, PAX4                                                                                                                           |
| 12                                                                          | 05410   | 2.613E-02  | 2.897      | 2.315  | 6    | 50           | Hypertrophic cardiomyopathy (HCM)<br>IGF1, ITGA5, ITGB1, SGCA, TPM1, CACNG4                                                                                                          |
| 13                                                                          | 05210   | 2.613E-02  | 2.897      | 2.315  | 6    | 50           | Colorectal cancer<br>BCL2, CTNNB1, FOS, PIK3R1, TCF7, TCF7L2                                                                                                                         |
| 14                                                                          | 05414   | 3.106E-02  | 2.769      | 2.408  | 6    | 52           | Dilated cardiomyopathy<br>IGF1, ITGA5, ITGB1, SGCA, TPM1, CACNG4                                                                                                                     |

| ID                                                   | P-value | Odds ratio | Exp. count | Count | Size | Pathway Name                                           | Genes                                                                                                                                    |
|------------------------------------------------------|---------|------------|------------|-------|------|--------------------------------------------------------|------------------------------------------------------------------------------------------------------------------------------------------|
| 15                                                   | 04971   | 3.201E-02  | 1.806      | 5     | 39   | Gastric acid secretion                                 | CALM1, GNAI2, ITPR3, KCNJ2, KCNJ16                                                                                                       |
| 16                                                   | 04340   | 3.791E-02  | 1.296      | 4     | 28   | Hedgehog signaling pathway                             | GAS1, GLI3, WNT5A, SUFU                                                                                                                  |
| 17                                                   | 04630   | 3.830E-02  | 3.195      | 7     | 69   | Jak-STAT signaling pathway                             | CBLB, PIK3R1, STAT3, SOCS3, SPRY1, SPRY2, SPRY4                                                                                          |
| Non-coding DE-probe in intron of protein-coding gene |         |            |            |       |      |                                                        |                                                                                                                                          |
| 1                                                    | 04520   | 1.783E-06  | 3.286      | 14    | 46   | Adherens junction                                      | CTNND1, IGFIR, PTPRE, PTPRJ, PTPRM, PVRL1, TCF7, TCF7L2, TGFBRI, VCL, IQGAPI, SORBS1, PARD3, PVRL4                                       |
| 2                                                    | 04510   | 1.418E-04  | 8.929      | 21    | 125  | Focal adhesion                                         | BCL2, CAV1, CCND3, COL4A1, COL6A1, COL6A2, FLNC, IGFIR, ITGA9, ITGB8, LAMA3, LAMB3, LAMC1, MYLK, PXN, TNR, VASP, VCL, VEGFC, SHC2, PDGFC |
| 3                                                    | 04144   | 3.735E-04  | 8.214      | 19    | 115  | Endocytosis                                            | CAV1, DAB2, DNMI, DNM2, IGFIR, LDLR, MDM2, PSD, RAB5C, TGFBRI, IQSEC1, VPS4A, SH3KBPI, PARD3, SH3GLB2, VPS25, RAB11FIP4, FAM125B, ARAP1  |
| 4                                                    | 05412   | 6.566E-04  | 3.071      | 10    | 43   | Arrhythmogenic right ventricular cardiomyopathy (ARVC) | CACNA1C, DMD, ITGA9, ITGB8, JUP, LMNA, SGCD, TCF7, TCF7L2, CACNA2D2                                                                      |
| 5                                                    | 04512   | 2.642E-03  | 3.643      | 10    | 51   | ECM-receptor interaction                               | COL4A1, COL6A1, COL6A2, ITGA9, ITGB8, LAMA3, LAMB3, LAMC1, TNR, AGRN                                                                     |
| 6                                                    | 04974   | 7.225E-03  | 2.929      | 8     | 41   | Protein digestion and absorption                       | ATP1A1, COL4A1, COL6A1, COL6A2, ELN, MME, SLC7A8, COL18A1                                                                                |
| 7                                                    | 05217   | 7.378E-03  | 2.357      | 7     | 33   | Basal cell carcinoma                                   | GLI3, TCF7, TCF7L2, TP53, AXIN2, SUFU, WNT5B                                                                                             |
| 8                                                    | 04722   | 7.752E-03  | 6.214      | 13    | 87   | Neurotrophin signaling pathway                         | BCL2, CAMK2B, CAMK2G, GAB1, NGFR, NTF3, NTRK2, NTRK3, RPS6KA2, TP53, MAPKAPK2, SH2B3, SHC2                                               |
| 9                                                    | 05215   | 9.955E-03  | 4.357      | 10    | 61   | Prostate cancer                                        | AR, BCL2, FOXO1, IGFIR, MDM2, TCF7, TCF7L2, TP53, CREB5, PDGFC                                                                           |
| 10                                                   | 05414   | 1.003E-02  | 3.714      | 9     | 52   | Dilated cardiomyopathy                                 | ADCY6, CACNA1C, DMD, ITGA9, ITGB8, LMNA, SGCD, TPM1, CACNA2D2                                                                            |
| 11                                                   | 04360   | 1.340E-02  | 5.929      | 12    | 83   | Axon guidance                                          | EFNA5, EPHB1, GNAI2, ABLIM1, LIMK2, RGS3, SLIT1, SLIT3, SEMA5A, SEMA6D, UNC5B, SEMA3D                                                    |

| ID | P-value | Odds ratio | Exp. count | Count | Size | Pathway Name                           | Genes                                                                                                                                                      |
|----|---------|------------|------------|-------|------|----------------------------------------|------------------------------------------------------------------------------------------------------------------------------------------------------------|
| 12 | 05200   | 1.810E-02  | 15.500     | 24    | 217  | Pathways in cancer                     | FAS, AR, BCL2, BCL2L1, COL4A1, FOXO1, FOS, GLI3, IGF1R, JUP, LAMA3, LAMB3, LAMC1, MDM2, RARA, TCF7, TCF7L2, TGFB1, TP53, VEGFC, ZBTB16, AXIN2, SUFU, WNT5B |
| 13 | 04971   | 1.845E-02  | 2.786      | 7     | 39   | Gastric acid secretion                 | ADCY6, ATP1A1, CAMK2B, CAMK2G, GNAI2, KCNJ2, MYLK                                                                                                          |
| 14 | 05410   | 2.337E-02  | 3.571      | 8     | 50   | Hypertrophic cardiomyopathy (HCM)      | CACNA1C, DMD, ITGA9, ITGB8, LMNA, SGCD, TPM1, CACNA2D2                                                                                                     |
| 15 | 05100   | 4.213E-02  | 3.286      | 7     | 46   | Bacterial invasion of epithelial cells | CAV1, DNMI1, DNMI2, GAB1, PXN, VCL, SHC2                                                                                                                   |

Non-coding DE-probe antisense to protein-coding gene

|   |       |           |        |    |     |                                        |                                                                                                                                                                     |
|---|-------|-----------|--------|----|-----|----------------------------------------|---------------------------------------------------------------------------------------------------------------------------------------------------------------------|
| 1 | 04520 | 1.509E-03 | 3.401  | 10 | 46  | Adherens junction                      | CSNK2A1, CTNNB1, EP300, IGF1R, PTPN1, SRC, TCF7L2, TGFB1, TGFB2, VCL                                                                                                |
| 2 | 05100 | 1.509E-03 | 3.401  | 10 | 46  | Bacterial invasion of epithelial cells | CAV1, CAV2, CLTC, CRK, CTNNB1, DNMI1, GAB1, PXN, SRC, VCL                                                                                                           |
| 3 | 05215 | 4.293E-03 | 4.510  | 11 | 61  | Prostate cancer                        | AR, BCL2, CDK2, CDKN1A, CTNNB1, E2F1, EP300, IGF1R, PDGFRB, TCF7L2, CREB3L2                                                                                         |
| 4 | 04110 | 6.922E-03 | 6.137  | 13 | 83  | Cell cycle                             | BUB1B, CDC25A, CDC25B, CDK2, CDKN1A, E2F1, EP300, MCM2, MCM3, PCNA, PLK1, SMC1A, BUB3                                                                               |
| 5 | 05200 | 1.482E-02 | 16.045 | 25 | 217 | Pathways in cancer                     | BIRC5, AR, BCL2, BCL2L1, BRCA2, RUNX1, CDK2, CDKN1A, CRK, CTNNB1, E2F1, EP300, ETS1, FGF1, FOS, FZD2, IGF1R, ITGA2, PDGFRB, RARA, STAT1, TCF7L2, TGFB1, TGFB2, FZD5 |
| 6 | 03030 | 1.611E-02 | 1.553  | 5  | 21  | DNA replication                        | MCM2, MCM3, PCNA, RPA1, POLD3                                                                                                                                       |
| 7 | 04350 | 1.992E-02 | 3.475  | 8  | 47  | TGF-beta signaling pathway             | BMP6, BMP1B, DCN, EP300, ID1, INHBA, TGFB1, TGFB2                                                                                                                   |
| 8 | 04144 | 2.024E-02 | 8.503  | 15 | 115 | Endocytosis                            | CAV1, CAV2, CLTC, DNMI1, IGF1R, LDLR, PSD, SRC, TFR3, TGFB1, TGFB2, RAB31, GIT1, ASAP1, RAB11FIP4                                                                   |
| 9 | 03430 | 2.607E-02 | 1.183  | 4  | 16  | Mismatch repair                        | PCNA, RPA1, EXO1, POLD3                                                                                                                                             |

| ID | P-value | Odds ratio | Exp. count | Count | Size | Pathway Name | Genes                    |                                                                 |
|----|---------|------------|------------|-------|------|--------------|--------------------------|-----------------------------------------------------------------|
| 10 | 04916   | 4.326E-02  | 2.097      | 4.732 | 9    | 64           | Melanogenesis            | CALM2, CAMK2B, CTNNB1, EP300, FZD2, GNAS, TCF7L2, FZD5, CREB3L2 |
| 11 | 05220   | 4.651E-02  | 2.178      | 4.067 | 8    | 55           | Chronic myeloid leukemia | BCL2L1, RUNX1, CDKN1A, CRK, E2F1, TGFBR1, TGFBR2, GAB2          |
