# Supplementary material for: Long Non-Coding RNAs Differentially Expressed between Normal versus Primary Breast Tumor Tissues Disclose Converse Changes to Breast Cancer-Related Protein-Coding Genes
Source: PubMed Central journal article supplement (PMC4180073; doi:10.1371/journal.pone.0106076), 2014-09-29
Supplement: pone.0106076.s014.pdf [file pone.0106076.s014.pdf]

| Annotation                                | Abbreviation      | Source/URL                                                                                                                                                                                                                                                        | Assembly    | Citation                                            | Comment                                                                                                                                                                                            |
|-------------------------------------------|-------------------|-------------------------------------------------------------------------------------------------------------------------------------------------------------------------------------------------------------------------------------------------------------------|-------------|-----------------------------------------------------|----------------------------------------------------------------------------------------------------------------------------------------------------------------------------------------------------|
| Protein-coding gene annotation            |                   |                                                                                                                                                                                                                                                                   |             |                                                     |                                                                                                                                                                                                    |
| Coding exons                              | CDS               | Gencode v12                                                                                                                                                                                                                                                       | GRCh37/hg19 | Gencode [1]                                         | -                                                                                                                                                                                                  |
| Introns                                   | intron            | Gencode v12 and UCSC table browser (tracks: UCSC genes, RefSeq genes, Ensembl genes)                                                                                                                                                                              | GRCh37/hg19 | Gencode [1], Ensembl [2], RefSeq [3], UCSC [4]; [5] | Defined as intronic nucleotides which do not overlap any exon of a protein-coding transcript.                                                                                                      |
| Intergenic                                | intergenic        | Gencode v12 and UCSC table browser (tracks: UCSC genes, RefSeq genes, Ensembl genes)                                                                                                                                                                              | GRCh37/hg19 | Gencode [1], Ensembl [2], RefSeq [3], UCSC [4]; [5] | Defined as the complement of all known protein-coding transcripts.                                                                                                                                 |
| UTRs                                      | UTRs              | Gencode v12                                                                                                                                                                                                                                                       | GRCh37/hg19 | Gencode [1]                                         | -                                                                                                                                                                                                  |
| Non-coding gene annotation                |                   |                                                                                                                                                                                                                                                                   |             |                                                     |                                                                                                                                                                                                    |
| Long non-coding RNAs                      | lncRNAs (Gencode) | <a href="ftp://ftp.sanger.ac.uk/pub/gencode/release_12/gencode.v12.long_noncoding_RNAs.gtf.gz">ftp://ftp.sanger.ac.uk/pub/gencode/release_12/gencode.v12.long_noncoding_RNAs.gtf.gz</a>                                                                           | GRCh37/hg19 | Gencode [1]                                         | The original set of long non-coding RNAs as annotated in Gencode was reduced to a set of <i>bona fide</i> non-coding RNAs without any evidence for functional short ORFs (see descriptions above). |
| Large intergenic non-coding RNAs          | lincRNAs          | <a href="http://www.broadinstitute.org/genome_bio/human_lincrnas/sites/default/files/lincRNA_catalog/lincRNAs_transcripts.bed">http://www.broadinstitute.org/genome_bio/human_lincrnas/sites/default/files/lincRNA_catalog/lincRNAs_transcripts.bed</a>           | GRCh37/hg19 | [6]                                                 | -                                                                                                                                                                                                  |
| Transcripts of uncertain coding potential | TUCP              | <a href="http://www.broadinstitute.org/genome_bio/human_lincrnas/sites/default/files/TUCP_transcripts_catalog/TUCP_transcripts.gtf">http://www.broadinstitute.org/genome_bio/human_lincrnas/sites/default/files/TUCP_transcripts_catalog/TUCP_transcripts.gtf</a> | GRCh37/hg19 | [6]                                                 | -                                                                                                                                                                                                  |
| Chromatin associated RNAs                 | CARs              | -                                                                                                                                                                                                                                                                 | NCBI36/hg18 | [7]                                                 | Mapped to GRCh37/hg19 using liftOver [5].                                                                                                                                                          |

| Annotation                                      | Abbreviation             | Source/URL                                                                                                                                                                | Assembly    | Citation    | Comment                                                                                                                                                                         |
|-------------------------------------------------|--------------------------|---------------------------------------------------------------------------------------------------------------------------------------------------------------------------|-------------|-------------|---------------------------------------------------------------------------------------------------------------------------------------------------------------------------------|
| lncRNAs                                         | lncRNAdb                 | <a href="http://lncrnadb.com">http://lncrnadb.com</a>                                                                                                                     | -           | [8]         | Coordinates in GRCh37/hg19 have been derived by BLAT [9] with parameters <code>-trimHardA -minIdentity=95</code> .                                                              |
| Short RNAs                                      | miRNAs, snoRNAs, scaRNAs | UCSC table browser (track: sno/miRNA)                                                                                                                                     | GRCh37/hg19 | [10, 11, 5] | -                                                                                                                                                                               |
| Intronic non-coding RNAs                        | TINs, PINs               | UCSC Genome Browser mirror for functional RNA ( <a href="http://www.ncrna.org/global/cgi-bin/hgGateway">http://www.ncrna.org/global/cgi-bin/hgGateway</a> )               | NCBI36/hg18 | [12]        | Mapped to GRCh37/hg19 using liftOver [5]. The original set of human intronic non-coding RNAs [12] was reassessed according to gene annotation in hg19 (see descriptions above). |
| <b>Regions of conserved secondary structure</b> |                          |                                                                                                                                                                           |             |             |                                                                                                                                                                                 |
| RNAZ                                            | RNAZ                     | -                                                                                                                                                                         | GRCh37/hg19 | [13]        | -                                                                                                                                                                               |
| SISSIZ                                          | SISSIZ                   | -                                                                                                                                                                         | GRCh37/hg19 | [13]        | -                                                                                                                                                                               |
| EvoFold                                         | EvoFold                  | UCSC table browser (track: EvoFold)                                                                                                                                       | GRCh37/hg19 | [14, 5]     | -                                                                                                                                                                               |
| <b>Regulation Tracks</b>                        |                          |                                                                                                                                                                           |             |             |                                                                                                                                                                                 |
| H3K4 trimethylation                             | H3K4me3                  | <a href="ftp://hgdownload.cse.ucsc.edu/goldenPath/hg18/encodeDCC/wgEncodeBroadChIPSeq/">ftp://hgdownload.cse.ucsc.edu/goldenPath/hg18/encodeDCC/wgEncodeBroadChIPSeq/</a> | NCBI36/hg18 | [15, 5]     | Chromatin-mark associated with promoter sites [16, 17]. Mapped to GRCh37/hg19 using liftOver [5].                                                                               |
| CpG islands                                     | CpG                      | UCSC table browser (track: CpG Islands)                                                                                                                                   | GRCh37/hg19 | [18, 5]     | Associated with transcription start sites [19, 20].                                                                                                                             |
| DNaseI hypersensitive sites                     | DNaseI                   | UCSC table browser (track: DNaseI Clusters)                                                                                                                               | GRCh37/hg19 | [15, 5]     | Associated with transcription factor binding sites [17, 21].                                                                                                                    |
| Transcription factor binding sites (TFBs)       | TFBs (Encode)            | UCSC table browser (track: Txn Factor ChIP)                                                                                                                               | GRCh37/hg19 | [15, 5]     | Binding sites identified by ChIP-seq [15].                                                                                                                                      |
| PoIII binding sites                             | POL-II                   | <a href="ftp://hgdownload.cse.ucsc.edu/goldenPath/hg18/encodeDCC/wgEncodeBroadChIPSeq/">ftp://hgdownload.cse.ucsc.edu/goldenPath/hg18/encodeDCC/wgEncodeBroadChIPSeq/</a> | NCBI36/hg18 | [15, 5]     | PoIII binding sites derived by ChIP-seq [15]. Mapped to GRCh37/hg19 using liftOver [5].                                                                                         |

| Annotation           | Abbreviation | Source/URL                                                                    | Assembly    | Citation | Comment                                                                                                               |
|----------------------|--------------|-------------------------------------------------------------------------------|-------------|----------|-----------------------------------------------------------------------------------------------------------------------|
| H3K36 trimethylation | H3K36me3     | ftp://hgdownload.cse.ucsc.edu/goldenPath/hg18/encodeDCC/wgEncodeBroadChIPSeq/ | NCBI36/hg18 | [15, 5]  | Chromatin-mark associated with active regions of PolII transcripts [22]. Mapped to GRCh37/hg19 using liftOver [5].    |
| H3K27 trimethylation | H3K27me3     | ftp://hgdownload.cse.ucsc.edu/goldenPath/hg18/encodeDCC/wgEncodeBroadChIPSeq/ | NCBI36/hg18 | [15, 5]  | Chromatin-mark associated with repressed regions of PolII transcripts [23]. Mapped to GRCh37/hg19 using liftOver [5]. |
| H3K4 monomethylation | H3K4me1      | ftp://hgdownload.cse.ucsc.edu/goldenPath/hg18/encodeDCC/wgEncodeBroadChIPSeq/ | NCBI36/hg18 | [15, 5]  | Chromatin-mark associated with enhancer regions [24, 17]. Mapped to GRCh37/hg19 using liftOver [5].                   |
| H3K27 acetylation    | H3K27ac      | ftp://hgdownload.cse.ucsc.edu/goldenPath/hg18/encodeDCC/wgEncodeBroadChIPSeq/ | NCBI36/hg18 | [15, 5]  | Chromatin-mark associated with enhancer and promoter sites [15, 25, 26]. Mapped to GRCh37/hg19 using liftOver [5].    |
| Other                |              |                                                                               |             |          |                                                                                                                       |
| Repeats              | -            | UCSC table browser (track: Masker)                                            | GRCh37/hg19 | [27, 5]  | -                                                                                                                     |
| Genome gaps          | -            | UCSC table browser (track: Gap)                                               | GRCh37/hg19 | [5]      | -                                                                                                                     |

## References

- [1] Harrow J, Frankish A, Gonzalez JM, Tapanari E, Diekhans M, et al. (2012) GENCODE: the reference human genome annotation for The ENCODE Project. *Genome Res* 22: 1760–1774.
- [2] Hubbard T, Barker D, Birney E, Cameron G, Chen Y, et al. (2002) The Ensembl genome database project. *Nucleic Acids Res* 30: 38–41.
- [3] Pruitt KD, Tatusova T, Maglott DR (2007) NCBI reference sequences (RefSeq): a curated non-redundant sequence database of genomes, transcripts and proteins. *Nucleic Acids Res* 35: D61–D65.
- [4] Meyer LR, Zweig AS, Hinrichs AS, Karolchik D, Kuhn RM, et al. (2013) The UCSC genome browser database: extensions and updates 2013. *Nucleic Acids Res* : D64-9.
- [5] Kuhn RM, Haussler D, Kent WJ (2012) The UCSC genome browser and associated tools. *Brief Bioinformatics* .
- [6] Cabili MN, Trapnell C, Goff L, Koziol M, Tazon-Vega B, et al. (2011) Integrative annotation of human large intergenic noncoding RNAs reveals global properties and specific subclasses. *Genes Dev* 25: 1915–1927.
- [7] Mondal T, Rasmussen M, Pandey GK, Isaksson A, Kanduri C (2010) Characterization of the RNA content of chromatin. *Genome Res* 20: 899–907.
- [8] Amaral P, Clark M, Gascoigne D, Dinger M, Mattick J (2011) lncRNADB: a reference database for long noncoding RNAs. *Nucleic Acids Res* 39: D146–D151.
- [9] Kent WJ (2002) BLAT—the BLAST-like alignment tool. *Genome Res* 12: 656–664.
- [10] Lestrade L, Weber MJ (2006) snoRNA-LBME-db, a comprehensive database of human H/ACA and C/D box snoRNAs. *Nucleic Acids Res* 34: D158–D162.
- [11] Griffiths-Jones S (2004) The microRNA Registry. *Nucleic Acids Res* 32: D109–D111.
- [12] Nakaya HI, Amaral PP, Louro R, Lopes A, Fachel AA, et al. (2007) Genome mapping and expression analyses of human intronic noncoding RNAs reveal tissue-specific patterns and enrichment in genes related to regulation of transcription. *Genome Biol* 8: R43.
- [13] Smith MA, Gesell T, Stadler PF, Mattick JS (2013) Widespread purifying selection on RNA structure in mammals. *Nucleic Acids Res* 41: 8220-8236.
- [14] Pedersen JS, Bejerano G, Siepel A, Rosenbloom K, Lindblad-Toh K, et al. (2006) Identification and classification of conserved RNA secondary structures in the human genome. *PLoS Comput Biol* 2: e33.
- [15] Birney E, Stamatoyannopoulos J, Dutta A, Guigó R, Gingeras T, et al. (2007) Identification and analysis of functional elements in 1% of the human genome by the ENCODE pilot project. *Nature* 447: 799–816.
- [16] Roh TY, Cuddapah S, Cui K, Zhao K (2006) The genomic landscape of histone modifications in human T cells. *Proc Natl Acad Sci U S A* 103: 15782–15787.

- [17] Bulger M, Groudine M (2010) Enhancers: the abundance and function of regulatory sequences beyond promoters. *Dev Biol* 339: 250–257.
- [18] Gardiner-Garden M, Frommer M (1987) CpG islands in vertebrate genomes. *J Mol Biol* 196: 261–282.
- [19] Deaton AM, Bird A (2011) CpG islands and the regulation of transcription. *Genes Dev* 25: 1010–1022.
- [20] Guenther MG, Levine SS, Boyer LA, Jaenisch R, Young RA (2007) A chromatin landmark and transcription initiation at most promoters in human cells. *Cell* 130: 77–88.
- [21] Xi H, Shulha HP, Lin JM, Vales TR, Fu Y, et al. (2007) Identification and characterization of cell type-specific and ubiquitous chromatin regulatory structures in the human genome. *PLoS Genet* 3: e136.
- [22] Mikkelsen TS, Ku M, Jaffe DB, Issac B, Lieberman E, et al. (2007) Genome-wide maps of chromatin state in pluripotent and lineage-committed cells. *Nature* 448: 553–560.
- [23] Barski A, Cuddapah S, Cui K, Roh TY, Schones DE, et al. (2007) High-resolution profiling of histone methylations in the human genome. *Cell* 129: 823–837.
- [24] Heintzman ND, Stuart RK, Hon G, Fu Y, Ching CW, et al. (2007) Distinct and predictive chromatin signatures of transcriptional promoters and enhancers in the human genome. *Nat Genet* 39: 311–318.
- [25] Terrenoire E, McRonald F, Halsall JA, Page P, Illingworth RS, et al. (2010) Immunostaining of modified histones defines high-level features of the human metaphase epigenome. *Genome Biol* 11: R110.
- [26] Shin JH, Li RW, Gao Y, Baldwin R 6th, Li Cj (2012) Genome-wide ChIP-seq mapping and analysis reveal butyrate-induced acetylation of H3K9 and H3K27 correlated with transcription activity in bovine cells. *Funct Integr Genomics* 12: 119–130.
- [27] Smit A, Hubley R, Green P (2010) RepeatMasker Open-3.0. URL <http://www.repeatmasker.org>.
