# Supplementary material for: Long Non-Coding RNAs Differentially Expressed between Normal versus Primary Breast Tumor Tissues Disclose Converse Changes to Breast Cancer-Related Protein-Coding Genes
Source: PubMed Central journal article supplement (PMC4180073; doi:10.1371/journal.pone.0106076), 2014-09-29
Supplement: pone.0106076.s015.pdf [file pone.0106076.s015.pdf]

---

RT-qPCR primers (from 5' to 3' end)

---

| Transcript ID       | forward                     | reverse                         |
|---------------------|-----------------------------|---------------------------------|
| CAR-FTX             | CCC ATC CAG CAG GGA TAC TA  | CAG AAT TGC TTA ATT GTG GCA TTA |
| CAR-CALD1           | GAA ACT TTT GGC ACA GGC TTA | AGA GGG AGC AAA CAG CTT CA      |
| CAR-HNRNPH1         | GAG GGC AAT CCT CAA TGA AA  | GGC TAG CTT ATG GCA AGG TG      |
| HDAC3 mRNA          | TGA GAC ATC GCT GCT GGT AG  | GGT CCA GAT ACT GGC GTG AG      |
| HDAC3 antisense RNA | AGA GCC CCT TCC AAA TCT CT  | CAA GGA CTG AGA TTG CCT CTG     |
| $\beta$ -Actin mRNA | CCT GGC ACC CAG CAC AAT     | GCC GAT CCA CAC GGA GTA CT      |
