# Supplementary material for: Long Non-Coding RNAs Differentially Expressed between Normal versus Primary Breast Tumor Tissues Disclose Converse Changes to Breast Cancer-Related Protein-Coding Genes
Source: PLoS One. 2014 Sep 29;9(9):e106076. doi: 10.1371/journal.pone.0106076 (PMC4180073; doi:10.1371/journal.pone.0106076)
Supplement: Table S3 — Known non-coding RNAs differentially expressed between normal versus tumor samples. Summary of known non-coding RNAs (Gencode v12) significantly differentially expressed between normal and tumor patient samples (). Column headings indicate official Gencode gene name (Gene name), Gencode identifier (Gene ID), if ncRNA transcript is bona fide non-coding (Bona fide non-coding, for detailed description of filter refer to Methods S1), Gencode transcript ID (Transcript ID), position of transcript in human genome version hg19 (Position of transcript), position of probe in human genome version hg19 (Position of probe), custom array probe ID (Probe ID), and fold change in log2 scale (logFC). A fold change of indicates , and a fold change of denotes . (XLSX) [file pone.0106076.s010.xlsx]

## Sheet: Table 1
	Gene name	Gene ID	Transcript ID	Bona fide non-coding	Position of transcript	Probe ID	Position of probe	logFC
1	AAA1-003	ENSG00000197085.6	ENST00000436945.2		chr7:34758473-34873940:-	CUST_1859_PI398636448	chr7:34758903-34758963:-	-568
1	AAA1-205	ENSG00000197085.6	ENST00000442669.2		chr7:34758473-34873941:-	CUST_1859_PI398636448	chr7:34758903-34758963:-	-568
2	AC003090.1-001	ENSG00000223561.2	ENST00000446840.1	yes	chr7:25632970-25702673:-	CUST_4951_PI398500404	chr7:25702416-25702476:-	-728
2	AC003090.1-002	ENSG00000223561.2	ENST00000423689.2		chr7:25696690-25702561:-	CUST_4951_PI398500404	chr7:25702416-25702476:-	-728
3	AC005154.6-003	ENSG00000196295.4	ENST00000426529.1		chr7:30587974-30603614:-	A_24_P918441	chr7:30590233-30590293:-	1074
4	AC007038.7-001	ENSG00000229127.1	ENST00000452057.1		chr2:210895456-210929080:+	CUST_1245_PI398636438	chr2:210897301-210897361:+	927
5	AC007557.2-001	ENSG00000237479.1	ENST00000421907.1	yes	chr2:217731054-217732536:-	A_24_P59688	chr2:217731088-217731148:-	-796
6	AC007563.1-001	ENSG00000236295.1	ENST00000418591.1		chr2:217735163-217738655:-	CUST_2795_PI398636438	chr2:217735416-217735476:-	-555
7	AC008280.5-001	ENSG00000239235.3	ENST00000458030.3		chr2:54197974-54307601:+	A_32_P110575	chr2:54198362-54198422:+	402
7	AC008280.5-003	ENSG00000239235.3	ENST00000422521.2		chr2:54198244-54293184:+	A_32_P110575	chr2:54198362-54198422:+	402
8	AC009950.1-001	ENSG00000243565.1	ENST00000441657.1		chr2:231068339-231078874:+	CUST_4870_PI398635289	chr2:231078814-231078874:+	-779
9	AC013402.2-001	ENSG00000235597.1	ENST00000451400.1		chr2:105049724-105137290:+	CUST_5920_PI398634432	chr2:105050889-105050949:+	-1091
9	AC013402.2-002	ENSG00000235597.1	ENST00000414442.1	yes	chr2:105050823-105122563:+	CUST_5920_PI398634432	chr2:105050889-105050949:+	-1091
9	AC013402.2-003	ENSG00000235597.1	ENST00000447380.1		chr2:105050835-105129215:+	CUST_5920_PI398634432	chr2:105050889-105050949:+	-1091
9	AC013402.2-004	ENSG00000235597.1	ENST00000429464.1		chr2:105050819-105124289:+	CUST_5920_PI398634432	chr2:105050889-105050949:+	-1091
10	AC025165.8-001	ENSG00000224713.1	ENST00000444467.1		chr12:58006121-58011828:-	CUST_1002_PI398636438	chr12:58006471-58006531:-	-508
10	AC025165.8-002	ENSG00000224713.1	ENST00000356672.3		chr12:58005900-58011848:-	CUST_1002_PI398636438	chr12:58006471-58006531:-	-508
11	AC046143.5-001	ENSG00000231770.1	ENST00000453671.1		chr3:194304739-194310989:+	CUST_3431_PI398636438	chr3:194310841-194310901:+	639
11	AC046143.5-002	ENSG00000231770.1	ENST00000447982.1		chr3:194304910-194310978:+	CUST_3431_PI398636438	chr3:194310841-194310901:+	639
11	AC046143.5-003	ENSG00000231770.1	ENST00000419571.1		chr3:194305027-194310978:+	CUST_3431_PI398636438	chr3:194310841-194310901:+	639
12	AC051649.16-001	ENSG00000229671.1	ENST00000455671.1		chr11:1923876-1929145:+	CUST_1292_PI398636448	chr11:1929069-1929129:+	-826
						CUST_120_PI398636427	chr11:1929085-1929145:+	-874
13	AC053545.3-001	ENSG00000227145.1	ENST00000417927.1		chr4:123540137-123610311:+	CUST_3891_PI398636438	chr4:123609712-123609772:+	-1149
14	AC058791.1-001	ENSG00000226380.1	ENST00000432045.1	yes	chr7:130565750-130598069:-	CUST_9736_PI398500390	chr7:130566217-130566277:-	817
						CUST_9737_PI398500390	chr7:130566277-130566337:-	804
						CUST_5772_PI398500390	chr7:130566291-130566351:-	706
						CUST_7507_PI398635289	chr7:130597945-130598005:-	1000
						CUST_7508_PI398635289	chr7:130598005-130598065:-	1397
15	AC058791.2-001	ENSG00000231721.2	ENST00000451786.1		chr7:130628925-130794935:-	CUST_190_PI398635289	chr7:130629049-130629109:-	557
						CUST_1416_PI398635289	chr7:130630074-130630134:-	988
						CUST_1417_PI398635289	chr7:130630166-130630226:-	1275
						CUST_1418_PI398635289	chr7:130630231-130630291:-	1024
						A_24_P455972	chr7:130792549-130792609:-	1750
15	AC058791.2-002	ENSG00000231721.2	ENST00000433079.1	yes	chr7:130628920-130791789:-	CUST_190_PI398635289	chr7:130629049-130629109:-	557
15	AC058791.2-003	ENSG00000231721.2	ENST00000429901.1	yes	chr7:130737202-130792858:-	A_24_P455972	chr7:130792549-130792609:-	1750
15	AC058791.2-004	ENSG00000231721.2	ENST00000423414.1	yes	chr7:130626518-130792822:-	A_24_P455972	chr7:130792549-130792609:-	1750
15	AC058791.2-007	ENSG00000231721.2	ENST00000431189.1	yes	chr7:130630368-130792738:-	A_24_P455972	chr7:130792549-130792609:-	1750
15	AC058791.2-008	ENSG00000231721.2	ENST00000443623.1	yes	chr7:130628926-130668868:-	CUST_190_PI398635289	chr7:130629049-130629109:-	557
16	AC073283.4-001	ENSG00000234690.2	ENST00000419035.1		chr2:47441087-47572105:-	CUST_2188_PI398636438	chr2:47442070-47442130:-	-992
17	AC073626.2-001	ENSG00000224595.1	ENST00000415146.1		chr7:114054298-114059930:-	CUST_18816_PI398500300	chr7:114054753-114054813:-	784
18	AC091729.9-001	ENSG00000229043.1	ENST00000423008.1		chr7:1200009-1204903:+	CUST_2688_PI398636438	chr7:1203839-1203899:+	-632
18	AC091729.9-002	ENSG00000229043.1	ENST00000422230.1		chr7:1200129-1204211:+	CUST_2688_PI398636438	chr7:1203839-1203899:+	-632
19	AC097662.2-001	ENSG00000236432.2	ENST00000396588.2		chr2:228110425-228189902:-	CUST_1955_PI398636438	chr2:228110758-228110818:-	567
20	AC107070.1-001	ENSG00000237401.1	ENST00000425949.1		chr2:4007240-4021609:-	A_32_P197744	chr2:4008048-4008108:-	-794
20	AC107070.1-002	ENSG00000237401.1	ENST00000454455.1		chr2:4005244-4021660:-	A_32_P197744	chr2:4008048-4008108:-	-794
20	AC107070.1-003	ENSG00000237401.1	ENST00000453880.1		chr2:4007851-4021617:-	A_32_P197744	chr2:4008048-4008108:-	-794
21	AL022476.2-001	ENSG00000230319.1	ENST00000443063.1		chr22:43434590-43448372:+	CUST_4526_PI398636438	chr22:43448231-43448291:+	-600
22	AL096869.5-001	ENSG00000233208.1	ENST00000419459.1		chr14:90921614-90925248:+	CUST_38573_PI398500300	chr14:90923104-90923164:+	-703
23	AP000696.2-001	ENSG00000231324.1	ENST00000457669.1	yes	chr21:38004978-38009331:-	A_24_P508391	chr21:38005005-38005065:-	-837
24	AP001092.5-001	ENSG00000228732.1	ENST00000428350.1		chr11:64418766-64423783:+	CUST_895_PI398636438	chr11:64423498-64423558:+	-622
25	AP001258.4-001	ENSG00000245571.2	ENST00000501817.2		chr11:58897605-58910228:-	A_32_P159574	chr11:58902511-58902571:-	724
26	ARHGEF7-AS2-001	ENSG00000235875.1	ENST00000425094.1		chr13:111766620-111768025:-	CUST_1670_PI398636438	chr13:111766620-111766680:-	-996
27	C17orf76-AS1-007	ENSG00000175061.9	ENST00000497774.1		chr17:16342324-16345309:+	CUST_128_PI398636435	chr17:16343360-16343420:+	-642
27	C17orf76-AS1-011	ENSG00000175061.9	ENST00000492250.1		chr17:16342351-16344816:+	CUST_273_PI398636453	chr17:16344552-16344612:+	-1160
27	C17orf76-AS1-013	ENSG00000175061.9	ENST00000491009.1		chr17:16342640-16345093:+	CUST_273_PI398636453	chr17:16344552-16344612:+	-1160
27	C17orf76-AS1-014	ENSG00000175061.9	ENST00000460249.1		chr17:16342640-16344880:+	CUST_273_PI398636453	chr17:16344552-16344612:+	-1160
28	CASC2-006	ENSG00000177640.11	ENST00000454857.1		chr10:119806534-119966501:+	CUST_48453_PI398500300	chr10:119966262-119966322:+	-1221
29	CECR7-001	ENSG00000237438.1	ENST00000441006.1		chr22:17517459-17539682:+	CUST_2637_PI398636433	chr22:17539562-17539622:+	1340
						CUST_2636_PI398636433	chr22:17539622-17539682:+	994
30	CLRN1-AS1-001	ENSG00000239265.1	ENST00000476886.1		chr3:150570270-150798513:+	CUST_735_PI398636448	chr3:150797341-150797401:+	-567
30	CLRN1-AS1-002	ENSG00000239265.1	ENST00000465576.1		chr3:150690464-150797617:+	CUST_735_PI398636448	chr3:150797341-150797401:+	-567
31	CTA-204B4.6-001	ENSG00000259758.1	ENST00000560295.1		chr8:141530254-141539600:-	CUST_2970_PI398636438	chr8:141530497-141530557:-	983
						CUST_2971_PI398636438	chr8:141530557-141530617:-	891
						CUST_2972_PI398636438	chr8:141530618-141530678:-	880
						CUST_2973_PI398636438	chr8:141530718-141530778:-	941
						CUST_21156_PI398500110	chr8:141534342-141534402:-	859
						CUST_2730_PI398500116	chr8:141537800-141537860:-	889
						CUST_4178_PI398500116	chr8:141535799-141535859:-	-908
32	CTA-305I2.2-001	ENSG00000259643.1	ENST00000561021.1		chr7:101816778-101818248:+	CUST_4189_PI398500627	chr7:101817227-101817287:+	-2399
33	CTB-58E17.1-001	ENSG00000261005.1	ENST00000563897.1		chr17:36858704-36861000:+	CUST_6315_PI398500300	chr17:36860098-36860158:+	-1558
34	CTC-228N24.3-001	ENSG00000245937.2	ENST00000499346.2		chr5:127276117-127418792:-	A_32_P147149	chr5:127276748-127276808:-	499
34	CTC-228N24.3-002	ENSG00000245937.2	ENST00000514409.1		chr5:127276696-127418720:-	A_32_P147149	chr5:127276748-127276808:-	499
34	CTC-228N24.3-009	ENSG00000245937.2	ENST00000501702.2		chr5:127357219-127418766:-	CUST_276_PI398636433	chr5:127357505-127357565:-	571
35	CTC-235G5.3-001	ENSG00000248127.1	ENST00000503652.1		chr5:75377770-75380011:-	CUST_1396_PI398500110	chr5:75379951-75380011:-	-900
36	CTC-281B15.1-002	ENSG00000247572.2	ENST00000500148.2		chr5:80533383-80597363:-	A_24_P618401	chr5:80535062-80535122:-	515
36	CTC-281B15.1-003	ENSG00000247572.2	ENST00000501927.2		chr5:80533646-80597374:-	A_24_P618401	chr5:80535062-80535122:-	515
36	CTC-281B15.1-004	ENSG00000247572.2	ENST00000502041.2		chr5:80533383-80597378:-	A_24_P618401	chr5:80535062-80535122:-	515
37	CTD-2049J23.2-001	ENSG00000244040.1	ENST00000497452.1		chr3:159631188-159924879:-	CUST_561_PI398636438	chr3:159632170-159632230:-	-1375
38	CTD-2135D7.2-002	ENSG00000262732.1	ENST00000575137.1		chr16:14024533-14029467:-	CUST_3323_PI398636438	chr16:14024769-14024829:-	-606
39	CTD-2228K2.7-001	ENSG00000225138.2	ENST00000534918.1		chr5:478237-480999:+	CUST_1515_PI398636438	chr5:480536-480596:+	1042
						CUST_1514_PI398636438	chr5:480693-480753:+	734
40	CTD-2552B11.4-002	ENSG00000258441.1	ENST00000555379.1		chr14:21668237-21673662:-	A_24_P931030	chr14:21673454-21673514:-	997
41	CTD-2576F9.2-001	ENSG00000260521.1	ENST00000565166.1		chr15:95399142-95400205:+	A_32_P111507	chr15:95400011-95400071:+	2184
						A_24_P332292	chr15:95400121-95400181:+	2664
41	CTD-2576F9.2-002	ENSG00000260521.1	ENST00000564371.1		chr15:95399235-95400213:+	A_32_P111507	chr15:95400011-95400071:+	2184
						A_24_P332292	chr15:95400121-95400181:+	2664
41	CTD-2576F9.2-003	ENSG00000260521.1	ENST00000568835.1		chr15:95399058-95400214:+	A_32_P111507	chr15:95400011-95400071:+	2184
						A_24_P332292	chr15:95400121-95400181:+	2664
42	CTD-2651B20.8-001	ENSG00000261709.1	ENST00000564565.1	yes	chr15:45506645-45507242:-	CUST_58244_PI398500300	chr15:45507144-45507204:-	-1836
43	CTD-2653D5.1-001	ENSG00000255438.1	ENST00000526566.1		chr20:46306644-46315041:+	CUST_1320_PI398636438	chr20:46313553-46313613:+	-439
44	CTD-3065J16.9-001	ENSG00000255224.1	ENST00000524499.1		chr8:145132904-145134168:-	CUST_198_PI398636438	chr8:145133063-145133123:-	-782
45	CTD-3193O13.1-001	ENSG00000260500.1	ENST00000564226.1		chr19:7983536-7984042:-	CUST_1879_PI398636438	chr19:7983738-7983798:-	-850
46	DNM3OS-001	ENSG00000230630.1	ENST00000417354.1		chr1:172109460-172113934:-	A_23_P63447	chr1:172111284-172111344:-	906
47	EPB41L4A-AS1-001	ENSG00000224032.2	ENST00000413221.2		chr5:111496222-111499973:+	CUST_1050_PI398636433	chr5:111496970-111497437:+	1365
						CUST_1049_PI398636433	chr5:111497437-111497872:+	1388
						CUST_1048_PI398636433	chr5:111497872-111497932:+	1251
						A_23_P58538	chr5:111497888-111497948:+	1256
47	EPB41L4A-AS1-002	ENSG00000224032.2	ENST00000427306.2		chr5:111496225-111497999:+	CUST_1050_PI398636433	chr5:111496970-111497437:+	1365
						CUST_1049_PI398636433	chr5:111497437-111497872:+	1388
						CUST_1048_PI398636433	chr5:111497872-111497932:+	1251
						A_23_P58538	chr5:111497888-111497948:+	1256
47	EPB41L4A-AS1-003	ENSG00000224032.2	ENST00000442823.2		chr5:111496588-111498021:+	CUST_1048_PI398636433	chr5:111497872-111497932:+	1251
						A_23_P58538	chr5:111497888-111497948:+	1256
47	EPB41L4A-AS1-004	ENSG00000224032.2	ENST00000508590.1		chr5:111496630-111498008:+	CUST_1049_PI398636433	chr5:111497437-111497872:+	1388
						CUST_1048_PI398636433	chr5:111497872-111497932:+	1251
						A_23_P58538	chr5:111497888-111497948:+	1256
48	ERVK13-1-001	ENSG00000260565.1	ENST00000568395.1		chr16:2711149-2723442:-	A_24_P936363	chr16:2722059-2722119:-	873
48	ERVK13-1-002	ENSG00000260565.1	ENST00000569465.1		chr16:2711196-2723416:-	A_24_P936363	chr16:2722059-2722119:-	873
49	FKBP1A-SDCBP2-001	ENSG00000234684.1	ENST00000446423.1		chr20:1306064-1358827:+	CUST_1390_PI398636438	chr20:1358140-1358200:+	793
50	FTX-001	ENSG00000230590.1	ENST00000429124.1		chrX:73498208-73512435:-	CUST_463_PI398636448	chrX:73498617-73498677:-	1095
						CUST_464_PI398636448	chrX:73498677-73498737:-	1680
						CUST_465_PI398636448	chrX:73498737-73498797:-	1622
						CUST_466_PI398636448	chrX:73498797-73498857:-	1745
						CUST_467_PI398636448	chrX:73498857-73498917:-	1430
51	GAS5-002	ENSG00000234741.2	ENST00000431268.1		chr1:173833038-173837127:-	CUST_1107_PI398636444	chr1:173833681-173833741:-	610
						CUST_258_PI398636453	chr1:173833507-173833567:-	-693
						CUST_87_PI398636453	chr1:173833966-173834026:-	-1179
						CUST_141_PI398636435	chr1:173833970-173834030:-	-1359
51	GAS5-006	ENSG00000234741.2	ENST00000421068.1	yes	chr1:173834955-173837125:-	CUST_7_PI398636453	chr1:173835103-173835163:-	-1544
						CUST_261_PI398636429	chr1:173835103-173835164:-	-1633
						CUST_65_PI398636435	chr1:173835105-173835166:-	-1687
51	GAS5-007	ENSG00000234741.2	ENST00000456293.1	yes	chr1:173834386-173837129:-	CUST_7_PI398636453	chr1:173835103-173835163:-	-1544
						CUST_261_PI398636429	chr1:173835103-173835164:-	-1633
						CUST_65_PI398636435	chr1:173835105-173835166:-	-1687
51	GAS5-011	ENSG00000234741.2	ENST00000443799.1		chr1:173834490-173837127:-	CUST_7_PI398636453	chr1:173835103-173835163:-	-1544
						CUST_261_PI398636429	chr1:173835103-173835164:-	-1633
						CUST_65_PI398636435	chr1:173835105-173835166:-	-1687
51	GAS5-017	ENSG00000234741.2	ENST00000436285.1		chr1:173833038-173836181:-	CUST_1107_PI398636444	chr1:173833681-173833741:-	610
51	GAS5-018	ENSG00000234741.2	ENST00000442067.1		chr1:173833768-173836181:-	CUST_87_PI398636453	chr1:173833966-173834026:-	-1179
						CUST_141_PI398636435	chr1:173833970-173834030:-	-1359
51	GAS5-019	ENSG00000234741.2	ENST00000422183.1	yes	chr1:173833039-173836181:-	CUST_227_PI398636453	chr1:173833300-173833360:-	-656
51	GAS5-021	ENSG00000234741.2	ENST00000422008.1	yes	chr1:173833621-173836168:-	CUST_1107_PI398636444	chr1:173833681-173833741:-	610
51	GAS5-022	ENSG00000234741.2	ENST00000412059.1		chr1:173833038-173837125:-	CUST_1107_PI398636444	chr1:173833681-173833741:-	610
						CUST_258_PI398636453	chr1:173833507-173833567:-	-693
51	GAS5-023	ENSG00000234741.2	ENST00000422207.1	yes	chr1:173833041-173834044:-	CUST_1107_PI398636444	chr1:173833681-173833741:-	610
						CUST_87_PI398636453	chr1:173833966-173834026:-	-1179
						CUST_141_PI398636435	chr1:173833970-173834030:-	-1359
51	GAS5-024	ENSG00000234741.2	ENST00000434796.1	yes	chr1:173833117-173834039:-	CUST_227_PI398636453	chr1:173833300-173833360:-	-656
						CUST_87_PI398636453	chr1:173833966-173834026:-	-1179
						CUST_141_PI398636435	chr1:173833970-173834030:-	-1359
51	GAS5-025	ENSG00000234741.2	ENST00000444470.1	yes	chr1:173833091-173834043:-	CUST_87_PI398636453	chr1:173833966-173834026:-	-1179
						CUST_141_PI398636435	chr1:173833970-173834030:-	-1359
51	GAS5-026	ENSG00000234741.2	ENST00000454813.1	yes	chr1:173833039-173834009:-	CUST_258_PI398636453	chr1:173833507-173833567:-	-693
51	GAS5-029	ENSG00000234741.2	ENST00000456812.2	yes	chr1:173833038-173836181:-	CUST_227_PI398636453	chr1:173833300-173833360:-	-656
52	H19-001	ENSG00000130600.9	ENST00000414790.1		chr11:2016405-2019105:-	CUST_465_PI398636444	chr11:2016588-2016648:-	-933
52	H19-002	ENSG00000130600.9	ENST00000412788.1		chr11:2016405-2019044:-	CUST_465_PI398636444	chr11:2016588-2016648:-	-933
52	H19-003	ENSG00000130600.9	ENST00000439725.1		chr11:2016405-2018690:-	CUST_465_PI398636444	chr11:2016588-2016648:-	-933
52	H19-004	ENSG00000130600.9	ENST00000411861.1		chr11:2016405-2018447:-	CUST_465_PI398636444	chr11:2016588-2016648:-	-933
52	H19-005	ENSG00000130600.9	ENST00000417089.1		chr11:2016463-2018255:-	CUST_465_PI398636444	chr11:2016588-2016648:-	-933
52	H19-006	ENSG00000130600.9	ENST00000446406.1		chr11:2016445-2019057:-	CUST_465_PI398636444	chr11:2016588-2016648:-	-933
52	H19-007	ENSG00000130600.9	ENST00000431095.1		chr11:2016466-2019045:-	CUST_465_PI398636444	chr11:2016588-2016648:-	-933
52	H19-008	ENSG00000130600.9	ENST00000411754.1		chr11:2016466-2019027:-	CUST_465_PI398636444	chr11:2016588-2016648:-	-933
52	H19-009	ENSG00000130600.9	ENST00000422826.1		chr11:2016439-2019027:-	CUST_465_PI398636444	chr11:2016588-2016648:-	-933
52	H19-015	ENSG00000130600.9	ENST00000442037.1		chr11:2016405-2017421:-	CUST_465_PI398636444	chr11:2016588-2016648:-	-933
52	H19-201	ENSG00000130600.9	ENST00000535745.1		chr11:2016407-2019072:-	CUST_465_PI398636444	chr11:2016588-2016648:-	-933
53	HAS2-AS1-001	ENSG00000248690.2	ENST00000514180.1		chr8:122651585-122656933:+	CUST_2486_PI398636433	chr8:122656650-122656710:+	-745
53	HAS2-AS1-003	ENSG00000248690.2	ENST00000520043.1		chr8:122653675-122656933:+	CUST_2486_PI398636433	chr8:122656650-122656710:+	-745
54	HNRNPU-AS1-001	ENSG00000188206.5	ENST00000366527.3		chr1:245003939-245010205:-	CUST_5075_PI398500116	chr1:245004328-245004388:-	753
55	HOTAIR-001	ENSG00000228630.1	ENST00000424518.1		chr12:54356091-54368740:-	CUST_2477_PI398636433	chr12:54356410-54356470:-	-611
56	HOTTIP-003	ENSG00000243766.2	ENST00000472494.1	yes	chr7:27240055-27242441:+	A_32_P52386	chr7:27242324-27242384:+	800
						CUST_3896_PI398500404	chr7:27241985-27242045:+	-652
56	HOTTIP-004	ENSG00000243766.2	ENST00000521028.2		chr7:27240039-27246878:+	CUST_3896_PI398500404	chr7:27241985-27242045:+	-652
57	HOXD-AS1-001	ENSG00000224189.2	ENST00000416928.2		chr2:177037922-177043012:-	A_24_P307004	chr2:177042186-177042462:-	-640
57	HOXD-AS1-002	ENSG00000224189.2	ENST00000425005.1	yes	chr2:177041207-177053207:-	A_24_P307004	chr2:177042186-177042462:-	-640
57	HOXD-AS1-008	ENSG00000224189.2	ENST00000452365.1	yes	chr2:177041251-177053259:-	A_24_P307004	chr2:177042186-177042462:-	-640
57	HOXD-AS1-009	ENSG00000224189.2	ENST00000552156.1	yes	chr2:177041199-177042811:-	A_24_P307004	chr2:177042186-177042462:-	-640
57	HOXD-AS1-010	ENSG00000224189.2	ENST00000549329.1	yes	chr2:177041113-177042770:-	A_24_P307004	chr2:177042186-177042462:-	-640
58	ITPK1-AS1-001	ENSG00000258730.1	ENST00000553639.1		chr14:93533796-93538497:+	CUST_689_PI398636433	chr14:93536173-93536233:+	-1101
59	KB-1410C5.2-001	ENSG00000253679.1	ENST00000523121.1		chr8:102273768-102275131:-	A_32_P108986	chr8:102273806-102273866:-	-531
60	KB-1471A8.2-001	ENSG00000253531.1	ENST00000523563.1		chr8:120884717-120886723:-	CUST_351_PI398636438	chr8:120885421-120885481:-	-576
61	KCNQ1OT1-001	ENSG00000258492.1	ENST00000557213.1		chr11:2696555-2721224:-	CUST_1364_PI398636444	chr11:2696567-2696627:-	1222
						CUST_1362_PI398636444	chr11:2696700-2696760:-	1689
						CUST_1363_PI398636444	chr11:2696760-2696820:-	1614
						A_32_P41924	chr11:2696786-2696846:-	1629
						CUST_4188_PI398500116	chr11:2697648-2697708:-	1134
						CUST_3692_PI398500116	chr11:2698397-2698457:-	908
						CUST_2741_PI398500116	chr11:2704373-2704433:-	1143
						CUST_2264_PI398500116	chr11:2704782-2704842:-	1325
						A_32_P123743	chr11:2705209-2705269:-	1022
						CUST_2534_PI398500116	chr11:2712028-2712088:-	877
						CUST_711_PI398500110	chr11:2712406-2712466:-	1005
						CUST_1121_PI398500116	chr11:2719092-2719152:-	838
						CUST_262_PI398500110	chr11:2719899-2719959:-	830
						CUST_1844_PI398500392	chr11:2719937-2719997:-	1179
						CUST_1845_PI398500392	chr11:2720004-2720064:-	730
						CUST_1846_PI398500392	chr11:2720103-2720163:-	1260
62	KDM5B-AS1-001	ENSG00000228288.2	ENST00000417262.1	yes	chr1:202780089-202781041:+	A_24_P785894	chr1:202780973-202781033:+	-473
62	KDM5B-AS1-002	ENSG00000228288.2	ENST00000425295.1	yes	chr1:202780089-202781041:+	A_24_P785894	chr1:202780973-202781033:+	-473
63	KIAA1456-001	ENSG00000255494.1	ENST00000530150.1	yes	chr8:12651751-12675800:+	CUST_15753_PI398500110	chr8:12675704-12675764:+	-826
64	LA16c-366D3.1-001	ENSG00000260439.1	ENST00000569574.1		chr16:971072-984495:+	CUST_6709_PI398500110	chr16:984388-984448:+	-1351
65	LINC00094-001	ENSG00000235106.2	ENST00000430633.1		chr9:136890560-136893224:+	A_32_P116058	chr9:136893128-136893188:+	-1142
65	LINC00094-002	ENSG00000235106.2	ENST00000432807.1		chr9:136890616-136893224:+	A_32_P116058	chr9:136893128-136893188:+	-1142
66	LINC00200-001	ENSG00000229205.1	ENST00000425630.1		chr10:1205707-1210612:+	CUST_2763_PI398636433	chr10:1209907-1209967:+	-1570
67	LINC00222-001	ENSG00000203801.4	ENST00000430898.1	yes	chr6:109080663-109090208:+	CUST_1390_PI398636448	chr6:109090069-109090129:+	-1139
67	LINC00222-004	ENSG00000203801.4	ENST00000448744.1	yes	chr6:109072858-109091145:+	CUST_450_PI398636448	chr6:109089827-109089886:+	-573
						CUST_1392_PI398636448	chr6:109089827-109089887:+	-674
						CUST_1390_PI398636448	chr6:109090069-109090129:+	-1139
67	LINC00222-007	ENSG00000203801.4	ENST00000368974.3	yes	chr6:109080367-109090321:+	CUST_450_PI398636448	chr6:109089827-109089886:+	-573
						CUST_1392_PI398636448	chr6:109089827-109089887:+	-674
						CUST_1390_PI398636448	chr6:109090069-109090129:+	-1139
68	LINC00238-001	ENSG00000196553.9	ENST00000359454.6		chr14:66953088-66965271:+	A_32_P58513	chr14:66965189-66965249:+	-878
68	LINC00238-002	ENSG00000196553.9	ENST00000432289.1		chr14:66953384-66965271:+	A_32_P58513	chr14:66965189-66965249:+	-878
68	LINC00238-003	ENSG00000196553.9	ENST00000436570.2		chr14:66963400-66965271:+	A_32_P58513	chr14:66965189-66965249:+	-878
68	LINC00238-005	ENSG00000196553.9	ENST00000411796.2		chr14:66953108-66965270:+	A_32_P58513	chr14:66965189-66965249:+	-878
68	LINC00238-006	ENSG00000196553.9	ENST00000389594.3		chr14:66953071-66965270:+	A_32_P58513	chr14:66965189-66965249:+	-878
69	LINC00302-001	ENSG00000176075.6	ENST00000444515.1	yes	chr1:152627952-152629280:+	A_24_P289795	chr1:152629171-152629231:+	-572
69	LINC00302-201	ENSG00000176075.6	ENST00000536536.1	yes	chr1:152627952-152629266:+	A_24_P289795	chr1:152629171-152629231:+	-572
70	LINC00315-001	ENSG00000184274.3	ENST00000441947.1	yes	chr21:46720159-46725172:-	A_24_P100190	chr21:46723214-46723274:-	-921
71	LINC00319-002	ENSG00000188660.3	ENST00000342757.2		chr21:44869903-44873773:+	CUST_1088_PI398634434	chr21:44869975-44870035:+	-689
72	LINC00338-001	ENSG00000234912.3	ENST00000434411.1		chr17:75084754-75091068:+	A_32_P8529	chr17:75090442-75090502:+	641
72	LINC00338-007	ENSG00000234912.3	ENST00000566583.1		chr17:75084830-75091065:+	A_32_P8529	chr17:75090442-75090502:+	641
72	LINC00338-008	ENSG00000234912.3	ENST00000565256.1		chr17:75084830-75091065:+	A_32_P8529	chr17:75090442-75090502:+	641
73	LINC00467-001	ENSG00000153363.8	ENST00000423222.1		chr1:211556144-211605878:+	A_23_P1014	chr1:211605739-211605799:+	-501
74	LINC00472-004	ENSG00000233237.1	ENST00000426635.1	yes	chr6:72124148-72130472:-	A_23_P156408	chr6:72124397-72124457:-	1012
75	LINC00476-001	ENSG00000175611.6	ENST00000321517.3		chr9:98632565-98638258:-	A_32_P104518	chr9:98637826-98637886:-	990
76	LINC00478-001	ENSG00000215386.5	ENST00000458468.1		chr21:17442841-17982094:+	CUST_3189_PI398634432	chr21:17443544-17443604:+	2704
						A_32_P188953	chr21:17979345-17979405:+	813
76	LINC00478-002	ENSG00000215386.5	ENST00000456342.1		chr21:17443552-17979456:+	A_32_P188953	chr21:17979345-17979405:+	813
76	LINC00478-003	ENSG00000215386.5	ENST00000441820.1	yes	chr21:17909600-17979569:+	A_32_P188953	chr21:17979345-17979405:+	813
76	LINC00478-004	ENSG00000215386.5	ENST00000400178.2		chr21:17443433-17979450:+	CUST_3189_PI398634432	chr21:17443544-17443604:+	2704
						A_32_P188953	chr21:17979345-17979405:+	813
76	LINC00478-006	ENSG00000215386.5	ENST00000445461.1		chr21:17566787-17979542:+	A_32_P188953	chr21:17979345-17979405:+	813
76	LINC00478-007	ENSG00000215386.5	ENST00000428669.1	yes	chr21:17763933-17979438:+	A_32_P188953	chr21:17979345-17979405:+	813
76	LINC00478-009	ENSG00000215386.5	ENST00000453910.1	yes	chr21:17791837-17979423:+	A_32_P188953	chr21:17979345-17979405:+	813
77	MALAT1-001	ENSG00000251562.3	ENST00000534336.1		chr11:65265232-65273940:+	CUST_14037_PI398500110	chr11:65268054-65268114:+	1333
						A_23_P21143	chr11:65268571-65268631:+	2930
						A_24_P873659	chr11:65272872-65272932:+	2406
						CUST_4001_PI398500627	chr11:65273734-65273794:+	1374
						A_24_P497244	chr11:65273808-65273868:+	841
						CUST_1636_PI398636433	chr11:65273810-65273870:+	995
						CUST_1694_PI398636448	chr11:65273870-65273930:+	837
77	MALAT1-201	ENSG00000251562.3	ENST00000544868.1		chr11:65266515-65271100:+	CUST_14037_PI398500110	chr11:65268054-65268114:+	1333
						A_23_P21143	chr11:65268571-65268631:+	2930
78	MCF2L-AS1-001	ENSG00000235280.1	ENST00000446789.1		chr13:113621822-113623138:-	A_32_P147622	chr13:113622200-113622260:-	1039
79	MEG3-001	ENSG00000214548.8	ENST00000429159.2		chr14:101292444-101327360:+	CUST_1676_PI398636433	chr14:101295522-101295582:+	1739
						CUST_1675_PI398636433	chr14:101295582-101295642:+	1384
						CUST_1674_PI398636433	chr14:101295666-101295726:+	2032
						CUST_2529_PI398636433	chr14:101295766-101295826:+	2155
79	MEG3-002	ENSG00000214548.8	ENST00000423456.1		chr14:101292462-101327307:+	CUST_1676_PI398636433	chr14:101295522-101295582:+	1739
						CUST_1675_PI398636433	chr14:101295582-101295642:+	1384
						CUST_1674_PI398636433	chr14:101295666-101295726:+	2032
						CUST_2529_PI398636433	chr14:101295766-101295826:+	2155
79	MEG3-003	ENSG00000214548.8	ENST00000520714.1		chr14:101292454-101311828:+	CUST_1676_PI398636433	chr14:101295522-101295582:+	1739
						CUST_1675_PI398636433	chr14:101295582-101295642:+	1384
						CUST_1674_PI398636433	chr14:101295666-101295726:+	2032
						CUST_2529_PI398636433	chr14:101295766-101295826:+	2155
79	MEG3-004	ENSG00000214548.8	ENST00000455286.1	yes	chr14:101293747-101295643:+	CUST_1676_PI398636433	chr14:101295522-101295582:+	1739
						CUST_1675_PI398636433	chr14:101295582-101295642:+	1384
79	MEG3-005	ENSG00000214548.8	ENST00000398474.3		chr14:101296941-101327358:+	CUST_15228_PI398500110	chr14:101297444-101297504:+	2207
79	MEG3-006	ENSG00000214548.8	ENST00000451743.2		chr14:101292462-101327368:+	CUST_1676_PI398636433	chr14:101295522-101295582:+	1739
						CUST_1675_PI398636433	chr14:101295582-101295642:+	1384
						CUST_1674_PI398636433	chr14:101295666-101295726:+	2032
						CUST_2529_PI398636433	chr14:101295766-101295826:+	2155
79	MEG3-007	ENSG00000214548.8	ENST00000398518.2		chr14:101292463-101327331:+	CUST_1676_PI398636433	chr14:101295522-101295582:+	1739
						CUST_1675_PI398636433	chr14:101295582-101295642:+	1384
						CUST_1674_PI398636433	chr14:101295666-101295726:+	2032
						CUST_2529_PI398636433	chr14:101295766-101295826:+	2155
79	MEG3-009	ENSG00000214548.8	ENST00000424076.3		chr14:101292462-101313643:+	CUST_1676_PI398636433	chr14:101295522-101295582:+	1739
						CUST_1675_PI398636433	chr14:101295582-101295642:+	1384
						CUST_1674_PI398636433	chr14:101295666-101295726:+	2032
						CUST_2529_PI398636433	chr14:101295766-101295826:+	2155
79	MEG3-010	ENSG00000214548.8	ENST00000452120.2		chr14:101292469-101299665:+	CUST_1676_PI398636433	chr14:101295522-101295582:+	1739
						CUST_1675_PI398636433	chr14:101295582-101295642:+	1384
						CUST_1674_PI398636433	chr14:101295666-101295726:+	2032
						CUST_2529_PI398636433	chr14:101295766-101295826:+	2155
						CUST_4955_PI398500110	chr14:101296349-101296409:+	2807
						CUST_15228_PI398500110	chr14:101297444-101297504:+	2207
						CUST_1576_PI398500390	chr14:101297952-101298012:+	955
						CUST_361_PI398636444	chr14:101299177-101299237:+	3464
						CUST_360_PI398636444	chr14:101299313-101299373:+	2434
						CUST_359_PI398636444	chr14:101299390-101299450:+	2006
79	MEG3-011	ENSG00000214548.8	ENST00000398461.1		chr14:101299305-101327358:+	CUST_360_PI398636444	chr14:101299313-101299373:+	2434
						CUST_359_PI398636444	chr14:101299390-101299450:+	2006
79	MEG3-012	ENSG00000214548.8	ENST00000412736.2		chr14:101292484-101327314:+	CUST_1676_PI398636433	chr14:101295522-101295582:+	1739
						CUST_1675_PI398636433	chr14:101295582-101295642:+	1384
						CUST_1674_PI398636433	chr14:101295666-101295726:+	2032
						CUST_2529_PI398636433	chr14:101295766-101295826:+	2155
79	MEG3-013	ENSG00000214548.8	ENST00000521404.1		chr14:101292462-101327326:+	CUST_1676_PI398636433	chr14:101295522-101295582:+	1739
						CUST_1675_PI398636433	chr14:101295582-101295642:+	1384
						CUST_1674_PI398636433	chr14:101295666-101295726:+	2032
						CUST_2529_PI398636433	chr14:101295766-101295826:+	2155
79	MEG3-014	ENSG00000214548.8	ENST00000523671.2		chr14:101295637-101302637:+	CUST_1674_PI398636433	chr14:101295666-101295726:+	2032
						CUST_2529_PI398636433	chr14:101295766-101295826:+	2155
						CUST_4955_PI398500110	chr14:101296349-101296409:+	2807
						CUST_15228_PI398500110	chr14:101297444-101297504:+	2207
79	MEG3-015	ENSG00000214548.8	ENST00000522771.1		chr14:101292455-101313634:+	CUST_1676_PI398636433	chr14:101295522-101295582:+	1739
						CUST_1675_PI398636433	chr14:101295582-101295642:+	1384
						CUST_1674_PI398636433	chr14:101295666-101295726:+	2032
						CUST_2529_PI398636433	chr14:101295766-101295826:+	2155
						CUST_4955_PI398500110	chr14:101296349-101296409:+	2807
						CUST_15228_PI398500110	chr14:101297444-101297504:+	2207
79	MEG3-016	ENSG00000214548.8	ENST00000519709.1		chr14:101292470-101327345:+	CUST_1676_PI398636433	chr14:101295522-101295582:+	1739
						CUST_1675_PI398636433	chr14:101295582-101295642:+	1384
						CUST_1674_PI398636433	chr14:101295666-101295726:+	2032
						CUST_2529_PI398636433	chr14:101295766-101295826:+	2155
79	MEG3-025	ENSG00000214548.8	ENST00000556736.1		chr14:101292462-101327345:+	CUST_1676_PI398636433	chr14:101295522-101295582:+	1739
						CUST_1675_PI398636433	chr14:101295582-101295642:+	1384
						CUST_1674_PI398636433	chr14:101295666-101295726:+	2032
						CUST_2529_PI398636433	chr14:101295766-101295826:+	2155
79	MEG3-026	ENSG00000214548.8	ENST00000554639.1		chr14:101292468-101327363:+	CUST_1676_PI398636433	chr14:101295522-101295582:+	1739
						CUST_1675_PI398636433	chr14:101295582-101295642:+	1384
						CUST_1674_PI398636433	chr14:101295666-101295726:+	2032
						CUST_2529_PI398636433	chr14:101295766-101295826:+	2155
80	MEG8-002	ENSG00000258399.1	ENST00000553584.1		chr14:101361106-101373305:+	CUST_582_PI398636448	chr14:101361256-101361316:+	654
						CUST_581_PI398636448	chr14:101361316-101361376:+	845
80	MEG8-003	ENSG00000258399.1	ENST00000554852.1		chr14:101361225-101373343:+	CUST_582_PI398636448	chr14:101361256-101361316:+	654
						CUST_581_PI398636448	chr14:101361316-101361376:+	845
81	MFI2-AS1-001	ENSG00000228109.1	ENST00000415244.1		chr3:196729776-196731615:+	CUST_1289_PI398636438	chr3:196730606-196730666:+	-662
						CUST_4739_PI398636438	chr3:196731467-196731527:+	-825
81	MFI2-AS1-002	ENSG00000228109.1	ENST00000424769.1		chr3:196726330-196731607:+	CUST_4739_PI398636438	chr3:196731467-196731527:+	-825
81	MFI2-AS1-003	ENSG00000228109.1	ENST00000437064.1		chr3:196730507-196731609:+	CUST_4739_PI398636438	chr3:196731467-196731527:+	-825
81	MFI2-AS1-004	ENSG00000228109.1	ENST00000414354.1		chr3:196730620-196731611:+	CUST_4739_PI398636438	chr3:196731467-196731527:+	-825
82	MIAT-001	ENSG00000225783.2	ENST00000423278.1		chr22:27053335-27072438:+	CUST_8683_PI398635289	chr22:27066321-27066381:+	656
						CUST_45_PI398636433	chr22:27072072-27072132:+	509
82	MIAT-002	ENSG00000225783.2	ENST00000421151.1		chr22:27053431-27072438:+	CUST_8683_PI398635289	chr22:27066321-27066381:+	656
						CUST_45_PI398636433	chr22:27072072-27072132:+	509
82	MIAT-003	ENSG00000225783.2	ENST00000456129.1		chr22:27053483-27072438:+	CUST_8683_PI398635289	chr22:27066321-27066381:+	656
						CUST_45_PI398636433	chr22:27072072-27072132:+	509
82	MIAT-004	ENSG00000225783.2	ENST00000430080.1		chr22:27053483-27072438:+	CUST_8683_PI398635289	chr22:27066321-27066381:+	656
						CUST_45_PI398636433	chr22:27072072-27072132:+	509
83	MIR181A2HG-001	ENSG00000224020.1	ENST00000429139.1		chr9:127420745-127460910:+	CUST_1625_PI398636448	chr9:127460720-127460780:+	-825
84	MIR205HG-001	ENSG00000230937.3	ENST00000433108.1		chr1:209602164-209605890:+	CUST_26446_PI398500300	chr1:209604514-209604574:+	1740
84	MIR205HG-006	ENSG00000230937.3	ENST00000419143.1		chr1:209602856-209604631:+	CUST_26446_PI398500300	chr1:209604514-209604574:+	1740
85	MIRLET7DHG-001	ENSG00000230262.1	ENST00000416309.1	yes	chr9:96938883-96966818:-	CUST_633_PI398636448	chr9:96939024-96939084:-	-757
86	MLLT4-AS1-001	ENSG00000198221.6	ENST00000359760.5		chr6:168224555-168227389:-	A_32_P334340	chr6:168226407-168226467:-	1439
86	MLLT4-AS1-201	ENSG00000198221.6	ENST00000357510.6		chr6:168226196-168227466:-	A_32_P334340	chr6:168226407-168226467:-	1439
86	MLLT4-AS1-202	ENSG00000198221.6	ENST00000414943.1		chr6:168226370-168227135:-	A_32_P334340	chr6:168226407-168226467:-	1439
87	MRPL23-AS1-001	ENSG00000226416.1	ENST00000419080.1		chr11:2004466-2011150:-	CUST_354_PI398636444	chr11:2004466-2004526:-	-665
88	NBPF1-001	ENSG00000219481.3	ENST00000392963.3		chr1:16888817-16931427:-	A_24_P287272	chr1:16889985-16890044:-	1896
88	NBPF1-202	ENSG00000219481.3	ENST00000401007.3		chr1:16888922-16892211:-	A_24_P287272	chr1:16889985-16890044:-	1896
89	NEAT1-001	ENSG00000245532.2	ENST00000501122.2		chr11:65190268-65213011:+	A_24_P290999	chr11:65192003-65192062:+	1968
						A_24_P566916	chr11:65193273-65193333:+	1632
						CUST_1037_PI398636444	chr11:65193457-65193517:+	1942
						CUST_1332_PI398636448	chr11:65193577-65193637:+	1659
						CUST_801_PI398636448	chr11:65193644-65193704:+	1427
						CUST_939_PI398636444	chr11:65193704-65193764:+	1395
						CUST_798_PI398636448	chr11:65193764-65193824:+	2242
						CUST_191_PI398636444	chr11:65193824-65193884:+	2248
						CUST_936_PI398636444	chr11:65193884-65193944:+	1697
						CUST_734_PI398636433	chr11:65205160-65205220:+	1947
						CUST_733_PI398636433	chr11:65205302-65205362:+	1758
						CUST_731_PI398636433	chr11:65205582-65205642:+	1422
						CUST_730_PI398636433	chr11:65205709-65205769:+	1660
						A_23_P170110	chr11:65210407-65210467:+	2490
89	NEAT1-002	ENSG00000245532.2	ENST00000499732.1	yes	chr11:65190244-65192232:+	A_24_P290999	chr11:65192003-65192062:+	1968
90	NOP14-AS1-002	ENSG00000249673.1	ENST00000512712.1		chr4:2937272-2943596:+	A_24_P42539	chr4:2937501-2937561:+	559
90	NOP14-AS1-008	ENSG00000249673.1	ENST00000515194.1		chr4:2937272-2952794:+	A_24_P42539	chr4:2937501-2937561:+	559
91	OIP5-AS1-001	ENSG00000247556.2	ENST00000500949.2		chr15:41576202-41598732:+	A_32_P67544	chr15:41594064-41594124:+	-769
92	PRINS-001	ENSG00000238115.1	ENST00000443921.1		chr10:24536050-24544975:+	CUST_1263_PI398636448	chr10:24544715-24544775:+	803
						CUST_2315_PI398636433	chr10:24544851-24544911:+	889
						A_32_P10133	chr10:24544856-24544916:+	946
						CUST_1261_PI398636448	chr10:24544914-24544974:+	860
93	PYY2-001	ENSG00000237575.3	ENST00000441253.1		chr17:26553839-26555091:+	CUST_3017_PI398636433	chr17:26554780-26554840:+	-804
94	RMST-001	ENSG00000255794.2	ENST00000541282.1	yes	chr12:97858798-97927544:+	CUST_110_PI398636427	chr12:97889715-97889775:+	764
94	RMST-002	ENSG00000255794.2	ENST00000548886.1	yes	chr12:97886238-97954476:+	CUST_110_PI398636427	chr12:97889715-97889775:+	764
95	RP11-1055B8.4-001	ENSG00000262877.1	ENST00000571724.1		chr17:79362586-79364056:-	A_32_P222474	chr17:79363756-79363816:-	679
96	RP11-1096D5.1-001	ENSG00000260440.1	ENST00000567801.1	yes	chr18:59415408-59421928:+	CUST_570_PI398636438	chr18:59420037-59420097:+	633
97	RP11-10L12.4-001	ENSG00000246560.2	ENST00000501133.2		chr4:103749211-103765232:+	CUST_3598_PI398636438	chr4:103764650-103764710:+	-775
98	RP11-111A22.1-001	ENSG00000259536.1	ENST00000561460.1		chr15:40780239-40850183:+	CUST_3521_PI398636438	chr15:40849730-40849790:+	-592
99	RP11-111M22.3-001	ENSG00000255135.2	ENST00000530759.1	yes	chr11:76152381-76155618:-	A_24_P727501	chr11:76155456-76155516:-	694
99	RP11-111M22.3-005	ENSG00000255135.2	ENST00000571090.1		chr11:76153116-76155724:-	A_24_P727501	chr11:76155456-76155516:-	694
99	RP11-111M22.3-006	ENSG00000255135.2	ENST00000572035.1	yes	chr11:76152397-76155700:-	A_24_P727501	chr11:76155456-76155516:-	694
100	RP11-113K21.5-001	ENSG00000246067.2	ENST00000501011.2		chr11:82783107-82784688:+	CUST_193_PI398636438	chr11:82784479-82784539:+	665
						CUST_192_PI398636438	chr11:82784575-82784635:+	882
100	RP11-113K21.5-007	ENSG00000246067.2	ENST00000528156.1	yes	chr11:82783384-82784642:+	CUST_193_PI398636438	chr11:82784479-82784539:+	665
						CUST_192_PI398636438	chr11:82784575-82784635:+	882
	RP11-113K21.5-008	ENSG00000246067.2	ENST00000530270.1		chr11:82783396-82784754:+	CUST_193_PI398636438	chr11:82784479-82784539:+	665
-1						CUST_192_PI398636438	chr11:82784575-82784635:+	882
101	RP11-12L8.1-001	ENSG00000228127.1	ENST00000438885.1		chr1:116461996-116468529:+	CUST_28_PI398636438	chr1:116467748-116467808:+	-665
102	RP11-134G8.8-001	ENSG00000224818.1	ENST00000430471.1		chr1:201433510-201434274:-	CUST_663_PI398636446	chr1:201433583-201433644:-	698
103	RP11-151N17.2-001	ENSG00000179523.4	ENST00000313807.4		chr15:44825690-44829121:-	A_32_P22501	chr15:44828295-44828355:-	1484
103	RP11-151N17.2-002	ENSG00000179523.4	ENST00000560049.1		chr15:44827449-44829098:-	A_32_P22501	chr15:44828295-44828355:-	1484
103	RP11-151N17.2-004	ENSG00000179523.4	ENST00000560750.1		chr15:44819454-44828838:-	A_32_P22501	chr15:44828295-44828355:-	1484
104	RP11-152N13.5-001	ENSG00000227540.1	ENST00000457147.1		chr10:75012548-75014107:+	A_24_P810084	chr10:75013926-75013986:+	-1255
104	RP11-152N13.5-002	ENSG00000227540.1	ENST00000457758.1		chr10:75012789-75014102:+	A_24_P810084	chr10:75013926-75013986:+	-1255
104	RP11-152N13.5-003	ENSG00000227540.1	ENST00000394864.2		chr10:75012926-75014107:+	A_24_P810084	chr10:75013926-75013986:+	-1255
105	RP11-161M6.2-001	ENSG00000260807.2	ENST00000565467.1		chr16:1025760-1031596:-	CUST_545_PI398636444	chr16:1030301-1030361:-	-1430
						CUST_546_PI398636444	chr16:1030457-1030517:-	-1313
105	RP11-161M6.2-002	ENSG00000260807.2	ENST00000568394.1		chr16:1025760-1031590:-	CUST_545_PI398636444	chr16:1030301-1030361:-	-1430
						CUST_546_PI398636444	chr16:1030457-1030517:-	-1313
105	RP11-161M6.2-004	ENSG00000260807.2	ENST00000562570.1		chr16:1025760-1030913:-	CUST_545_PI398636444	chr16:1030301-1030361:-	-1430
						CUST_546_PI398636444	chr16:1030457-1030517:-	-1313
106	RP11-161M6.3-001	ENSG00000260496.1	ENST00000565401.1	yes	chr16:1046318-1047907:-	CUST_12526_PI398500300	chr16:1047693-1047753:-	-504
107	RP11-164A7.1-001	ENSG00000254635.1	ENST00000527986.1		chr10:28811580-28821672:-	A_24_P879563	chr10:28811814-28811874:-	810
107	RP11-164A7.1-002	ENSG00000254635.1	ENST00000528337.1		chr10:28811613-28821283:-	A_24_P879563	chr10:28811814-28811874:-	810
108	RP11-164P12.3-001	ENSG00000251455.1	ENST00000514269.1		chr4:152595634-152599045:+	CUST_1021_PI398636438	chr4:152597074-152597134:+	-817
109	RP11-166D19.1-001	ENSG00000255248.2	ENST00000529823.1		chr11:121959813-121972874:-	A_24_P794447	chr11:121960373-121960433:-	722
109	RP11-166D19.1-002	ENSG00000255248.2	ENST00000528986.1		chr11:121959817-121971737:-	A_24_P794447	chr11:121960373-121960433:-	722
109	RP11-166D19.1-003	ENSG00000255248.2	ENST00000524376.1		chr11:121959817-121971155:-	A_24_P794447	chr11:121960373-121960433:-	722
109	RP11-166D19.1-004	ENSG00000255248.2	ENST00000531381.1		chr11:121959810-121972886:-	A_24_P794447	chr11:121960373-121960433:-	722
110	RP11-196E1.3-001	ENSG00000254561.1	ENST00000532153.1		chr11:119479134-119529994:+	CUST_4234_PI398500300	chr11:119511058-119511118:+	-881
111	RP11-21L23.2-001	ENSG00000261578.1	ENST00000566747.1		chr11:76511407-76515599:+	A_32_P160438	chr11:76515276-76515336:+	-978
112	RP11-220I1.1-001	ENSG00000233137.1	ENST00000429493.1		chr9:37079892-37090398:+	A_24_P661593	chr9:37087392-37087452:+	614
						CUST_2874_PI398500110	chr9:37087839-37087899:+	1210
113	RP11-223I10.1-001	ENSG00000261829.1	ENST00000568958.1		chr2:231916754-231917352:+	CUST_999_PI398636444	chr2:231917140-231917200:+	-642
114	RP11-228B15.4-001	ENSG00000225032.1	ENST00000439298.1		chr9:130578344-130584799:+	A_24_P401473	chr9:130579598-130580073:+	868
115	RP11-242F24.1-001	ENSG00000228750.1	ENST00000432429.1	yes	chr1:6784696-6787468:+	A_32_P112933	chr1:6784826-6784886:+	-1388
115	RP11-242F24.1-002	ENSG00000228750.1	ENST00000414210.1	yes	chr1:6784696-6790072:+	A_32_P112933	chr1:6784826-6784886:+	-1388
116	RP11-245J9.2-001	ENSG00000239653.1	ENST00000472046.1		chr3:63989697-63997824:+	CUST_1350_PI398636438	chr3:63991588-63991649:+	593
117	RP11-252C15.1-001	ENSG00000254813.1	ENST00000534827.1	yes	chr8:12623357-12668987:-	CUST_2917_PI398636433	chr8:12623977-12624037:-	-496
117	RP11-252C15.1-002	ENSG00000254813.1	ENST00000530228.1	yes	chr8:12623570-12645965:-	CUST_2917_PI398636433	chr8:12623977-12624037:-	-496
118	RP11-266L9.2-002	ENSG00000260034.1	ENST00000565214.1		chr16:25151903-25157569:-	A_32_P147990	chr16:25153544-25153604:-	-500
119	RP11-284N8.3-001	ENSG00000259834.1	ENST00000566942.1		chr1:111196181-111199662:-	A_32_P69956	chr1:111199008-111199068:-	-526
120	RP11-290F5.2-001	ENSG00000180712.3	ENST00000317596.3		chr4:185261908-185275130:-	A_23_P379111	chr4:185263070-185263130:-	1509
120	RP11-290F5.2-002	ENSG00000180712.3	ENST00000511465.1	yes	chr4:185262842-185269065:-	A_23_P379111	chr4:185263070-185263130:-	1509
121	RP11-291L15.2-001	ENSG00000248890.1	ENST00000512359.1		chr4:145564523-145582509:-	A_32_P115050	chr4:145564777-145564837:-	-565
121	RP11-291L15.2-002	ENSG00000248890.1	ENST00000508269.1	yes	chr4:145564073-145567139:-	A_32_P115050	chr4:145564777-145564837:-	-565
121	RP11-291L15.2-003	ENSG00000248890.1	ENST00000503066.1	yes	chr4:145564375-145567064:-	A_32_P115050	chr4:145564777-145564837:-	-565
122	RP11-298D21.2-001	ENSG00000259914.1	ENST00000563342.1		chr16:83759280-83759982:-	CUST_27346_PI398500300	chr16:83759408-83759468:-	-573
123	RP11-304F15.4-001	ENSG00000248954.1	ENST00000515692.1		chr17:47964960-47978257:+	CUST_8940_PI398500404	chr17:47975738-47975798:+	-1582
124	RP11-31F15.1-001	ENSG00000226419.1	ENST00000435800.1		chr1:113499050-113544813:+	CUST_2025_PI398636438	chr1:113503135-113503195:+	1200
124	RP11-31F15.1-002	ENSG00000226419.1	ENST00000416193.1		chr1:113499036-113506694:+	CUST_2025_PI398636438	chr1:113503135-113503195:+	1200
						CUST_2022_PI398636438	chr1:113499044-113499104:+	-670
124	RP11-31F15.1-003	ENSG00000226419.1	ENST00000428411.1		chr1:113499082-113511609:+	CUST_2025_PI398636438	chr1:113503135-113503195:+	1200
124	RP11-31F15.1-004	ENSG00000226419.1	ENST00000420168.1		chr1:113499141-113511020:+	CUST_2025_PI398636438	chr1:113503135-113503195:+	1200
125	RP11-323F5.2-001	ENSG00000247708.2	ENST00000507244.1		chr4:4543869-4562286:+	A_32_P120292	chr4:4544099-4544159:+	696
125	RP11-323F5.2-002	ENSG00000247708.2	ENST00000512438.1		chr4:4543925-4592902:+	A_32_P120292	chr4:4544099-4544159:+	696
125	RP11-323F5.2-004	ENSG00000247708.2	ENST00000499430.2		chr4:4543857-4546634:+	A_32_P120292	chr4:4544099-4544159:+	696
126	RP11-328M4.2-001	ENSG00000234753.1	ENST00000454812.1		chr6:41491632-41516359:-	A_32_P226768	chr6:41491667-41491727:-	1027
126	RP11-328M4.2-002	ENSG00000234753.1	ENST00000432751.1		chr6:41491642-41515286:-	A_32_P226768	chr6:41491667-41491727:-	1027
126	RP11-328M4.2-004	ENSG00000234753.1	ENST00000414386.1	yes	chr6:41491632-41513914:-	A_32_P226768	chr6:41491667-41491727:-	1027
126	RP11-328M4.2-005	ENSG00000234753.1	ENST00000439386.1	yes	chr6:41491634-41513812:-	A_32_P226768	chr6:41491667-41491727:-	1027
127	RP11-328M4.3-001	ENSG00000226917.1	ENST00000448211.1		chr6:41486110-41487590:+	CUST_586_PI398636448	chr6:41486226-41486286:+	625
						CUST_4588_PI398636438	chr6:41486158-41486218:+	-526
128	RP11-349A22.5-002	ENSG00000257621.2	ENST00000554360.1		chr14:58732082-58764847:-	CUST_5035_PI398500116	chr14:58733089-58733149:-	975
						CUST_13863_PI398500110	chr14:58733225-58733285:-	1550
129	RP11-34A14.3-001	ENSG00000230928.1	ENST00000433374.1		chr10:100011779-100016332:+	CUST_60_PI398636438	chr10:100016268-100016328:+	-705
130	RP11-357C3.3-001	ENSG00000235437.2	ENST00000433061.1		chrX:62729821-62780929:-	CUST_376_PI398636433	chrX:62780722-62780782:-	1339
						CUST_377_PI398636433	chrX:62780802-62780862:-	937
131	RP11-367J11.4-001	ENSG00000245468.2	ENST00000501888.2	yes	chr4:7102966-7105112:-	CUST_2028_PI398500627	chr4:7104989-7105049:-	-877
132	RP11-386G11.8-001	ENSG00000257346.1	ENST00000553174.1		chr12:49483990-49486984:+	CUST_24523_PI398500300	chr12:49486751-49486811:+	-1522
133	RP11-395G23.3-001	ENSG00000254615.1	ENST00000521369.1		chr8:107282480-107285002:+	A_32_P151823	chr8:107284865-107284925:+	-777
134	RP11-413M3.4-001	ENSG00000227512.1	ENST00000439501.1		chr9:139437332-139438287:+	CUST_20811_PI398500110	chr9:139437859-139437919:+	1981
135	RP11-416N4.4-001	ENSG00000230506.1	ENST00000424931.1	yes	chr20:10154167-10177638:+	A_32_P61884	chr20:10177520-10177580:+	-978
	RP11-429B14.4-001	ENSG00000261478.1	ENST00000567484.1	yes	chr15:90052191-90053647:+	CUST_2588_PI398636438	chr15:90053291-90053351:+	-629
137	RP11-438E5.1-002	ENSG00000249307.1	ENST00000513153.1		chr4:80006392-80229807:+	A_32_P101623	chr4:80229715-80229775:+	-628
	RP11-438E5.1-003	ENSG00000249307.1	ENST00000512130.1		chr4:80118694-80229809:+	A_32_P101623	chr4:80229715-80229775:+	-628
137	RP11-438E5.1-005	ENSG00000249307.1	ENST00000507476.1		chr4:80116990-80229909:+	A_32_P101623	chr4:80229715-80229775:+	-628
137	RP11-438E5.1-006	ENSG00000249307.1	ENST00000505149.1		chr4:80226276-80229952:+	A_32_P101623	chr4:80229715-80229775:+	-628
137	RP11-438E5.1-007	ENSG00000249307.1	ENST00000511241.1		chr4:80179934-80229808:+	A_32_P101623	chr4:80229715-80229775:+	-628
138	RP11-453E2.2-001	ENSG00000234855.1	ENST00000424428.1		chr10:98862512-98863504:+	A_32_P179001	chr10:98863188-98863248:+	-1270
139	RP11-473I1.10-001	ENSG00000263244.1	ENST00000574616.1		chr16:9201097-9207038:+	CUST_8013_PI398500392	chr16:9205086-9205146:+	1621
						CUST_8012_PI398500392	chr16:9205146-9205206:+	1443
140	RP11-492E3.1-001	ENSG00000204054.5	ENST00000454968.1	yes	chr9:132245729-132266553:+	A_32_P95147	chr9:132266155-132266215:+	823
140	RP11-492E3.1-002	ENSG00000204054.5	ENST00000444184.1	yes	chr9:132250823-132266553:+	A_32_P95147	chr9:132266155-132266215:+	823
140	RP11-492E3.1-007	ENSG00000204054.5	ENST00000419300.1	yes	chr9:132251378-132267360:+	A_32_P95147	chr9:132266155-132266215:+	823
141	RP11-501C14.5-001	ENSG00000250838.1	ENST00000505903.1		chr17:47072627-47074854:-	CUST_4318_PI398500404	chr17:47072826-47072886:-	-1648
142	RP11-513O17.2-003	ENSG00000253301.1	ENST00000521653.1	yes	chr8:58106148-58121191:+	A_24_P931653	chr8:58106152-58106212:+	-816
142	RP11-513O17.2-004	ENSG00000253301.1	ENST00000518556.1	yes	chr8:58106152-58115727:+	A_24_P931653	chr8:58106152-58106212:+	-816
143	RP11-524D16 A.3-001	ENSG00000261295.1	ENST00000568809.1	yes	chrX:99928326-99928978:+	CUST_1005_PI398636444	chrX:99928381-99928441:+	1284
144	RP11-534G20.3-002	ENSG00000224597.3	ENST00000438399.1		chr10:29698475-29713107:+	CUST_1838_PI398636433	chr10:29710993-29711053:+	554
						CUST_1837_PI398636433	chr10:29711062-29711122:+	1076
						CUST_1835_PI398636433	chr10:29711187-29711247:+	735
144	RP11-534G20.3-003	ENSG00000224597.3	ENST00000427063.2		chr10:29698500-29711301:+	CUST_1838_PI398636433	chr10:29710993-29711053:+	554
						CUST_1837_PI398636433	chr10:29711062-29711122:+	1076
						CUST_1835_PI398636433	chr10:29711187-29711247:+	735
144	RP11-534G20.3-201	ENSG00000224597.3	ENST00000537908.1		chr10:29698485-29711238:+	CUST_1838_PI398636433	chr10:29710993-29711053:+	554
						CUST_1837_PI398636433	chr10:29711062-29711122:+	1076
145	RP11-536C5.7-001	ENSG00000227741.1	ENST00000418602.1		chr1:160171988-160178659:-	CUST_2281_PI398636438	chr1:160175779-160175839:-	-1161
146	RP11-553L6.5-001	ENSG00000259976.1	ENST00000570269.1		chr3:114033347-114035026:-	A_32_P200947	chr3:114034021-114034081:-	1108
147	RP11-557H15.4-001	ENSG00000232310.1	ENST00000418837.1	yes	chr6:134846462-134861482:-	CUST_33127_PI398500300	chr6:134861391-134861451:-	-546
148	RP11-573I11.2-002	ENSG00000236671.1	ENST00000426785.1		chr10:54011724-54057675:-	CUST_1374_PI398636438	chr10:54012306-54012366:-	-592
149	RP11-582J16.4-001	ENSG00000251034.1	ENST00000514980.1		chr8:22398357-22402918:-	CUST_1970_PI398636438	chr8:22398870-22398930:-	-699
150	RP11-597D13.9-002	ENSG00000248429.1	ENST00000508752.1		chr4:159097458-159122065:+	CUST_1816_PI398636438	chr4:159120615-159120675:+	872
150	RP11-597D13.9-004	ENSG00000248429.1	ENST00000505532.1		chr4:159092524-159122065:+	CUST_1816_PI398636438	chr4:159120615-159120675:+	872
151	RP11-617F23.1-001	ENSG00000259291.1	ENST00000558334.1		chr15:90617746-90625439:-	CUST_1656_PI398636438	chr15:90618081-90618141:-	1051
						CUST_1658_PI398636438	chr15:90617987-90618047:-	-1141
152	RP11-61A14.4-001	ENSG00000246777.1	ENST00000501143.1		chr16:66785654-66788643:+	CUST_4485_PI398636438	chr16:66787716-66787776:+	-791
153	RP11-65F13.2-004	ENSG00000237187.3	ENST00000504474.1		chr5:92877577-92917003:-	CUST_1663_PI398636433	chr5:92878300-92878360:-	1187
154	RP1-166H4.2-001	ENSG00000261080.1	ENST00000563807.1		chr6:45541082-45544507:-	CUST_774_PI398636438	chr6:45541148-45541208:-	1040
155	RP11-673E11.2-001	ENSG00000261257.1	ENST00000567082.1		chr11:125970399-125972308:-	CUST_8213_PI398500404	chr11:125971172-125971232:-	1467
						CUST_8211_PI398500404	chr11:125971369-125971429:-	-610
156	RP11-680B3.2-001	ENSG00000240521.1	ENST00000488190.1		chr3:148568719-148677899:-	CUST_1240_PI398636438	chr3:148569387-148569447:-	-871
157	RP11-70C1.1-001	ENSG00000225611.1	ENST00000432377.1		chr3:42812103-42815127:+	CUST_4708_PI398636438	chr3:42814924-42814984:+	-579
158	RP11-731J8.2-001	ENSG00000260918.1	ENST00000562284.1		chr4:47433976-47440976:+	A_32_P86802	chr4:47434555-47434615:+	-874
159	RP11-74C13.3-001	ENSG00000230550.1	ENST00000433869.1		chr1:204110535-204112137:+	CUST_914_PI398636438	chr1:204111305-204111365:+	-659
160	RP11-74N20.1-003	ENSG00000232860.2	ENST00000532582.1		chr1:183439154-183441400:-	A_24_P281228	chr1:183441180-183441240:-	-786
161	RP11-752G15.3-001	ENSG00000259462.1	ENST00000560650.1		chr15:83316520-83361572:+	CUST_3665_PI398636438	chr15:83361451-83361511:+	808
162	RP11-753D20.3-001	ENSG00000258538.1	ENST00000553487.1		chr14:88641734-88646542:+	A_32_P48019	chr14:88646378-88646438:+	-619
162	RP11-753D20.3-002	ENSG00000258538.1	ENST00000556789.1		chr14:88643476-88646542:+	A_32_P48019	chr14:88646378-88646438:+	-619
163	RP11-796E2.4-002	ENSG00000245904.2	ENST00000499685.2		chr12:92539956-92583436:+	CUST_2069_PI398636438	chr12:92578567-92578627:+	-1807
164	RP11-7O11.3-001	ENSG00000237950.1	ENST00000446167.1	yes	chr1:44410041-44411974:-	A_24_P612200	chr1:44410061-44410121:-	578
164	RP11-7O11.3-002	ENSG00000237950.1	ENST00000412378.1	yes	chr1:44410045-44412223:-	A_24_P612200	chr1:44410061-44410121:-	578
164	RP11-7O11.3-003	ENSG00000237950.1	ENST00000445226.1	yes	chr1:44410043-44411958:-	A_24_P612200	chr1:44410061-44410121:-	578
165	RP11-83N9.5-002	ENSG00000260193.1	ENST00000566567.1	yes	chr9:138999653-139000927:-	CUST_130_PI398636444	chr9:139000098-139000613:-	-598
165	RP11-83N9.5-003	ENSG00000260193.1	ENST00000563018.1	yes	chr9:138999950-139001270:-	CUST_130_PI398636444	chr9:139000098-139000613:-	-598
166	RP11-893F2.14-001	ENSG00000261959.1	ENST00000572855.1		chr17:48240883-48242677:-	CUST_1284_PI398636438	chr17:48241364-48241424:-	-711
167	RP11-90C4.2-001	ENSG00000230250.1	ENST00000458145.1		chr1:56381281-56410636:-	A_32_P97243	chr1:56381598-56381658:-	1267
168	RP11-930O11.2-001	ENSG00000259483.1	ENST00000560296.1	yes	chr14:56770207-56777479:-	CUST_822_PI398634434	chr14:56776820-56776880:-	-544
169	RP1-283K11.3-001	ENSG00000223542.1	ENST00000412954.1		chr6:133756214-133760602:-	CUST_1536_PI398636438	chr6:133756464-133756524:-	-634
170	RP1-46F2.2-001	ENSG00000185847.3	ENST00000331096.2		chr12:111374405-111375255:+	A_32_P211248	chr12:111375192-111375252:+	905
171	RP1-80B9.2-001	ENSG00000250903.2	ENST00000456943.2		chr6:2246010-2284008:+	A_24_P719948	chr6:2283900-2283960:+	1405
171	RP1-80B9.2-012	ENSG00000250903.2	ENST00000525811.1	yes	chr6:2246074-2284007:+	A_24_P719948	chr6:2283900-2283960:+	1405
172	RP3-333B15.4-001	ENSG00000260202.1	ENST00000564051.1	yes	chr20:23497520-23498706:-	CUST_4071_PI398636438	chr20:23498262-23498322:-	-716
173	RP3-416H24.1-001	ENSG00000257671.1	ENST00000546686.1		chr12:52638831-52641232:-	CUST_7951_PI398500110	chr12:52639103-52639163:-	735
174	RP4-564F22.2-001	ENSG00000196756.5	ENST00000436764.1	yes	chr20:37049234-37063976:-	A_24_P860703	chr20:37049277-37049337:-	1103
174	RP4-564F22.2-003	ENSG00000196756.5	ENST00000423536.1	yes	chr20:37049234-37059709:-	A_24_P860703	chr20:37049277-37049337:-	1103
174	RP4-564F22.2-005	ENSG00000196756.5	ENST00000414142.1		chr20:37049239-37063916:-	A_24_P860703	chr20:37049277-37049337:-	1103
						CUST_2534_PI398636433	chr20:37049826-37049886:-	-871
174	RP4-564F22.2-006	ENSG00000196756.5	ENST00000417578.1	yes	chr20:37049239-37063920:-	A_24_P860703	chr20:37049277-37049337:-	1103
174	RP4-564F22.2-009	ENSG00000196756.5	ENST00000449469.1		chr20:37049238-37057973:-	A_24_P860703	chr20:37049277-37049337:-	1103
175	RP4-575N6.4-001	ENSG00000225938.1	ENST00000432195.1	yes	chr1:101701238-101702084:-	A_32_P150300	chr1:101701306-101701366:-	-573
176	RP4-647C14.2-001	ENSG00000258376.1	ENST00000554614.1		chr14:73710725-73712687:-	CUST_2813_PI398636438	chr14:73711200-73711260:-	-563
177	RP4-668J24.2-001	ENSG00000261730.1	ENST00000568244.1	yes	chr6:1384024-1385301:-	CUST_63240_PI398500300	chr6:1384115-1384175:-	-1210
178	RP4-717I23.3-015	ENSG00000223745.1	ENST00000421202.1		chr1:93776725-93811368:-	A_24_P481375	chr1:93803824-93803884:-	1478
179	RP4-726N20.2-001	ENSG00000240889.1	ENST00000465466.1		chr7:140395135-140396877:-	CUST_104_PI398634434	chr7:140396259-140396319:-	-506
180	RP5-1021I20.1-001	ENSG00000259065.1	ENST00000556194.1		chr14:74254062-74269920:+	A_32_P8067	chr14:74269648-74269708:+	1108
180	RP5-1021I20.1-002	ENSG00000259065.1	ENST00000553470.1		chr14:74255667-74269973:+	A_32_P8067	chr14:74269648-74269708:+	1108
181	RP5-1069C8.2-001	ENSG00000233048.1	ENST00000456265.1	yes	chr20:12845849-12933167:-	CUST_4059_PI398636438	chr20:12846008-12846068:-	-472
182	RP5-1074L1.1-001	ENSG00000227963.1	ENST00000449169.1		chr1:110828996-110881793:-	CUST_1752_PI398636438	chr1:110829336-110829396:-	-649
183	RP5-1092A11.5-001	ENSG00000227589.1	ENST00000443034.1		chr1:3575501-3585336:-	A_24_P932220	chr1:3575655-3575715:-	-1162
184	RP5-1097F14.3-201	ENSG00000235710.3	ENST00000541173.1		chr1:231319850-231322143:-	A_24_P156734	chr1:231321563-231321623:-	-1371
185	RP5-1119D9.4-001	ENSG00000225988.1	ENST00000443469.1		chr20:9485826-9495645:-	CUST_1385_PI398636438	chr20:9486284-9486344:-	-690
186	RP5-855F14.1-001	ENSG00000231768.1	ENST00000435574.1		chr1:234663636-234667525:-	CUST_621_PI398636438	chr1:234664081-234664141:-	-542
						CUST_622_PI398636438	chr1:234664141-234664201:-	-742
187	RP5-881L22.4-001	ENSG00000229005.1	ENST00000452481.1		chr20:43006382-43024346:-	CUST_3727_PI398636438	chr20:43013184-43013244:-	-620
188	RP5-881L22.6-001	ENSG00000233376.1	ENST00000455642.1		chr20:43018263-43020177:-	CUST_3728_PI398636438	chr20:43020076-43020136:-	-563
189	RP5-968J1.1-001	ENSG00000230839.1	ENST00000447206.1		chr20:1784661-1798252:-	A_32_P142625	chr20:1791780-1791840:-	-792
190	RPPH1-001	ENSG00000259001.1	ENST00000554988.1		chr14:20811206-20811844:-	CUST_352_PI398636427	chr14:20811460-20811520:-	-1587
191	SCARNA10-001	ENSG00000256329.1	ENST00000541782.1		chr12:6619440-6619688:+	CUST_167_PI398636427	chr12:6619553-6619613:+	-846
192	SCARNA9-001	ENSG00000254911.1	ENST00000530422.1		chr11:93454678-93455031:+	CUST_1856_PI398636433	chr11:93454896-93454956:+	1403
						CUST_244_PI398636429	chr11:93454971-93455031:+	1831
193	SMAD5-AS1-001	ENSG00000164621.5	ENST00000297163.3		chr5:135465195-135470579:-	CUST_515_PI398636444	chr5:135465252-135465312:-	-523
194	SNHG1-001	ENSG00000255717.1	ENST00000540725.1	yes	chr11:62619459-62623218:-	CUST_11407_PI398500110	chr11:62619969-62620029:-	1099
						CUST_6017_PI398500116	chr11:62620006-62620066:-	1143
						CUST_1277_PI398636444	chr11:62619545-62619605:-	-488
						CUST_1378_PI398636448	chr11:62619646-62619706:-	-529
194	SNHG1-002	ENSG00000255717.1	ENST00000537925.1		chr11:62619459-62623339:-	CUST_11407_PI398500110	chr11:62619969-62620029:-	1099
						CUST_6017_PI398500116	chr11:62620006-62620066:-	1143
						CUST_1277_PI398636444	chr11:62619545-62619605:-	-488
						CUST_1378_PI398636448	chr11:62619646-62619706:-	-529
194	SNHG1-003	ENSG00000255717.1	ENST00000538654.1		chr11:62619460-62623357:-	CUST_11407_PI398500110	chr11:62619969-62620029:-	1099
						CUST_6017_PI398500116	chr11:62620006-62620066:-	1143
						CUST_65440_PI398500300	chr11:62620370-62620430:-	1077
						CUST_22646_PI398500110	chr11:62620843-62620903:-	771
						CUST_11390_PI398500390	chr11:62622693-62622753:-	591
						CUST_1277_PI398636444	chr11:62619545-62619605:-	-488
						CUST_1378_PI398636448	chr11:62619646-62619706:-	-529
						CUST_77_PI398636435	chr11:62622483-62622543:-	-833
194	SNHG1-004	ENSG00000255717.1	ENST00000537869.1	yes	chr11:62619462-62622932:-	CUST_11407_PI398500110	chr11:62619969-62620029:-	1099
						CUST_6017_PI398500116	chr11:62620006-62620066:-	1143
						CUST_1277_PI398636444	chr11:62619545-62619605:-	-488
						CUST_1378_PI398636448	chr11:62619646-62619706:-	-529
194	SNHG1-005	ENSG00000255717.1	ENST00000539975.1	yes	chr11:62619491-62622708:-	CUST_11407_PI398500110	chr11:62619969-62620029:-	1099
						CUST_6017_PI398500116	chr11:62620006-62620066:-	1143
						CUST_1277_PI398636444	chr11:62619545-62619605:-	-488
						CUST_1378_PI398636448	chr11:62619646-62619706:-	-529
194	SNHG1-006	ENSG00000255717.1	ENST00000539921.1	yes	chr11:62619459-62622708:-	CUST_11407_PI398500110	chr11:62619969-62620029:-	1099
						CUST_6017_PI398500116	chr11:62620006-62620066:-	1143
						CUST_1277_PI398636444	chr11:62619545-62619605:-	-488
						CUST_1378_PI398636448	chr11:62619646-62619706:-	-529
194	SNHG1-007	ENSG00000255717.1	ENST00000542112.1	yes	chr11:62619729-62623386:-	CUST_11407_PI398500110	chr11:62619969-62620029:-	1099
						CUST_6017_PI398500116	chr11:62620006-62620066:-	1143
194	SNHG1-009	ENSG00000255717.1	ENST00000544983.1	yes	chr11:62622153-62623230:-	CUST_77_PI398636435	chr11:62622483-62622543:-	-833
194	SNHG1-010	ENSG00000255717.1	ENST00000540904.1	yes	chr11:62622151-62622960:-	CUST_77_PI398636435	chr11:62622483-62622543:-	-833
194	SNHG1-011	ENSG00000255717.1	ENST00000537965.1	yes	chr11:62621839-62622960:-	CUST_77_PI398636435	chr11:62622483-62622543:-	-833
194	SNHG1-014	ENSG00000255717.1	ENST00000545440.1	yes	chr11:62619723-62622960:-	CUST_11407_PI398500110	chr11:62619969-62620029:-	1099
						CUST_6017_PI398500116	chr11:62620006-62620066:-	1143
194	SNHG1-015	ENSG00000255717.1	ENST00000545688.1	yes	chr11:62620220-62622932:-	CUST_65440_PI398500300	chr11:62620370-62620430:-	1077
194	SNHG1-016	ENSG00000255717.1	ENST00000535689.1	yes	chr11:62620825-62622960:-	CUST_22646_PI398500110	chr11:62620843-62620903:-	771
194	SNHG1-017	ENSG00000255717.1	ENST00000540865.1	yes	chr11:62620544-62622960:-	CUST_22646_PI398500110	chr11:62620843-62620903:-	771
194	SNHG1-018	ENSG00000255717.1	ENST00000544550.1	yes	chr11:62620303-62622960:-	CUST_65440_PI398500300	chr11:62620370-62620430:-	1077
194	SNHG1-020	ENSG00000255717.1	ENST00000541615.1	yes	chr11:62619761-62622960:-	CUST_11407_PI398500110	chr11:62619969-62620029:-	1099
						CUST_6017_PI398500116	chr11:62620006-62620066:-	1143
194	SNHG1-022	ENSG00000255717.1	ENST00000535076.1	yes	chr11:62619519-62621168:-	CUST_11407_PI398500110	chr11:62619969-62620029:-	1099
						CUST_6017_PI398500116	chr11:62620006-62620066:-	1143
						CUST_1277_PI398636444	chr11:62619545-62619605:-	-488
						CUST_1378_PI398636448	chr11:62619646-62619706:-	-529
194	SNHG1-024	ENSG00000255717.1	ENST00000545920.1		chr11:62620543-62621814:-	CUST_9995_PI398500392	chr11:62621523-62621583:-	474
194	SNHG1-025	ENSG00000255717.1	ENST00000537068.1	yes	chr11:62619459-62623353:-	CUST_1277_PI398636444	chr11:62619545-62619605:-	-488
						CUST_1378_PI398636448	chr11:62619646-62619706:-	-529
195	SNHG12-005	ENSG00000197989.8	ENST00000481368.1		chr1:28905051-28908175:-	CUST_60_PI398636435	chr1:28906892-28906952:-	-941
						CUST_28154_PI398500300	chr1:28906895-28906955:-	-800
195	SNHG12-008	ENSG00000197989.8	ENST00000461832.1	yes	chr1:28906870-28908369:-	CUST_60_PI398636435	chr1:28906892-28906952:-	-941
						CUST_28154_PI398500300	chr1:28906895-28906955:-	-800
195	SNHG12-009	ENSG00000197989.8	ENST00000464115.1		chr1:28906846-28908365:-	CUST_60_PI398636435	chr1:28906892-28906952:-	-941
						CUST_28154_PI398500300	chr1:28906895-28906955:-	-800
195	SNHG12-012	ENSG00000197989.8	ENST00000461448.1		chr1:28905049-28908354:-	CUST_60_PI398636435	chr1:28906892-28906952:-	-941
						CUST_28154_PI398500300	chr1:28906895-28906955:-	-800
196	SNHG14-001	ENSG00000224078.3	ENST00000447911.1	yes	chr15:25425460-25427855:+	CUST_265_PI398636427	chr15:25427795-25427855:+	-666
196	SNHG14-002	ENSG00000224078.3	ENST00000424208.1		chr15:25426989-25467432:+	CUST_236_PI398636427	chr15:25438292-25438352:+	-682
						CUST_125_PI398636427	chr15:25442575-25442635:+	-522
196	SNHG14-004	ENSG00000224078.3	ENST00000414175.1	yes	chr15:25434449-25438636:+	CUST_236_PI398636427	chr15:25438292-25438352:+	-682
196	SNHG14-005	ENSG00000224078.3	ENST00000424333.1		chr15:25442574-25459165:+	CUST_125_PI398636427	chr15:25442575-25442635:+	-522
196	SNHG14-006	ENSG00000224078.3	ENST00000450809.1	yes	chr15:25451226-25458676:+	CUST_104_PI398636427	chr15:25454948-25455008:+	-609
196	SNHG14-007	ENSG00000224078.3	ENST00000456576.1	yes	chr15:25438459-25442649:+	CUST_125_PI398636427	chr15:25442575-25442635:+	-522
	SNHG14-012	ENSG00000224078.3	ENST00000549804.1		chr15:25295778-25367623:+	CUST_547_PI398636448	chr15:25322056-25322116:+	763
						CUST_1169_PI398636448	chr15:25356979-25357039:+	613
						CUST_1155_PI398636448	chr15:25364321-25364381:+	720
						CUST_37_PI398636448	chr15:25364704-25364764:+	1426
						CUST_36_PI398636448	chr15:25364764-25364824:+	985
						A_24_P607880	chr15:25364822-25364882:+	588
						CUST_244_PI398636427	chr15:25364826-25364886:+	743
196	SNHG14-016	ENSG00000224078.3	ENST00000552781.1	yes	chr15:25264181-25299063:+	CUST_1677_PI398636448	chr15:25265804-25265864:+	899
196	SNHG14-017	ENSG00000224078.3	ENST00000551631.1		chr15:25224703-25266501:+	CUST_1677_PI398636448	chr15:25265804-25265864:+	899
						CUST_395_PI398636448	chr15:25265850-25265910:+	892
						CUST_393_PI398636448	chr15:25266058-25266118:+	1317
196	SNHG14-021	ENSG00000224078.3	ENST00000553134.1	yes	chr15:25245451-25265972:+	CUST_1677_PI398636448	chr15:25265804-25265864:+	899
						CUST_395_PI398636448	chr15:25265850-25265910:+	892
196	SNHG14-022	ENSG00000224078.3	ENST00000546682.1		chr15:25326300-25359074:+	CUST_1169_PI398636448	chr15:25356979-25357039:+	613
196	SNHG14-201	ENSG00000224078.3	ENST00000383025.2		chr15:25322012-25330407:+	CUST_547_PI398636448	chr15:25322056-25322116:+	763
197	SNHG7-002	ENSG00000233016.1	ENST00000447221.1		chr9:139619685-139622636:-	CUST_276_PI398636453	chr9:139620555-139620615:-	-1435
198	SNHG9-002	ENSG00000255198.2	ENST00000564014.1	yes	chr16:2015034-2015505:+	CUST_1309_PI398636444	chr16:2015251-2015311:+	-911
						CUST_1307_PI398636444	chr16:2015371-2015431:+	-1326
199	SNORD57-001	ENSG00000226572.1	ENST00000448188.1		chr20:2637584-2637656:+	CUST_125_PI398636453	chr20:2637596-2637656:+	-1140
200	ST7-AS1-001	ENSG00000227199.1	ENST00000456775.1		chr7:116592499-116594388:-	CUST_1117_PI398636448	chr7:116592813-116592873:-	653
						CUST_1118_PI398636448	chr7:116592873-116592933:-	612
201	TDRG1-001	ENSG00000204091.3	ENST00000448433.1	yes	chr6:40346075-40347624:+	CUST_2689_PI398636433	chr6:40347137-40347197:+	-700
						CUST_2686_PI398636433	chr6:40347349-40347409:+	-859
201	TDRG1-002	ENSG00000204091.3	ENST00000373170.2	yes	chr6:40346075-40347624:+	CUST_2689_PI398636433	chr6:40347137-40347197:+	-700
						CUST_2686_PI398636433	chr6:40347349-40347409:+	-859
201	TDRG1-003	ENSG00000204091.3	ENST00000451810.1	yes	chr6:40302692-40347624:+	CUST_2689_PI398636433	chr6:40347137-40347197:+	-700
						CUST_2686_PI398636433	chr6:40347349-40347409:+	-859
201	TDRG1-004	ENSG00000204091.3	ENST00000448559.1	yes	chr6:40308203-40347624:+	CUST_2689_PI398636433	chr6:40347137-40347197:+	-700
						CUST_2686_PI398636433	chr6:40347349-40347409:+	-859
202	TP53TG1-001	ENSG00000182165.12	ENST00000359941.5	yes	chr7:86954540-86974831:-	CUST_2819_PI398636433	chr7:86974530-86974590:-	-745
203	TPT1-AS1-001	ENSG00000170919.9	ENST00000524062.1		chr13:45915647-45965872:+	A_24_P110914	chr13:45965525-45965585:+	1408
203	TPT1-AS1-002	ENSG00000170919.9	ENST00000522673.1		chr13:45952694-45965857:+	A_24_P110914	chr13:45965525-45965585:+	1408
203	TPT1-AS1-003	ENSG00000170919.9	ENST00000517509.1		chr13:45915479-45965618:+	A_24_P110914	chr13:45965525-45965585:+	1408
203	TPT1-AS1-010	ENSG00000170919.9	ENST00000330825.3		chr13:45961719-45965610:+	A_24_P110914	chr13:45965525-45965585:+	1408
203	TPT1-AS1-020	ENSG00000170919.9	ENST00000379050.2		chr13:45964879-45965683:+	A_24_P110914	chr13:45965525-45965585:+	1408
203	TPT1-AS1-201	ENSG00000170919.9	ENST00000405697.3		chr13:45915647-45965872:+	A_24_P110914	chr13:45965525-45965585:+	1408
204	U73166.2-001	ENSG00000230454.1	ENST00000439898.1		chr3:50297734-50300790:+	A_24_P936692	chr3:50298153-50298213:+	-1516
205	WT1-AS-001	ENSG00000183242.7	ENST00000395900.1		chr11:32457124-32462950:+	CUST_1654_PI398636433	chr11:32461299-32461359:+	-601
205	WT1-AS-201	ENSG00000183242.7	ENST00000426618.2	yes	chr11:32459474-32461618:+	CUST_1654_PI398636433	chr11:32461299-32461359:+	-601
206	XIST-001	ENSG00000229807.3	ENST00000429829.1		chrX:73040490-73072588:-	CUST_2759_PI398636433	chrX:73040687-73040747:-	1258
						CUST_2760_PI398636433	chrX:73040801-73040861:-	1052
						CUST_22055_PI398500300	chrX:73041493-73041553:-	2106
						CUST_1053_PI398636444	chrX:73043155-73043215:-	1419
						A_24_P500584	chrX:73043191-73043251:-	1210
						CUST_1055_PI398636444	chrX:73043310-73043370:-	1325
						CUST_1551_PI398636444	chrX:73043370-73043430:-	1411
						CUST_1552_PI398636444	chrX:73043430-73043490:-	1645
						CUST_386_PI398636446	chrX:73044505-73044565:-	2053
						CUST_1006_PI398636448	chrX:73044565-73044625:-	2202
						CUST_1007_PI398636448	chrX:73044739-73044799:-	2326
						CUST_208_PI398636427	chrX:73044836-73044896:-	2030
						CUST_209_PI398636427	chrX:73045020-73045080:-	1431
						CUST_1330_PI398636444	chrX:73045575-73045635:-	2043
						CUST_1331_PI398636444	chrX:73045718-73045778:-	2612
						CUST_1332_PI398636444	chrX:73045783-73045843:-	2360
						CUST_1333_PI398636444	chrX:73045902-73045962:-	2548
						CUST_1334_PI398636444	chrX:73045965-73046025:-	1673
206	XIST-002	ENSG00000229807.3	ENST00000416330.1		chrX:73040490-73046179:-	CUST_2759_PI398636433	chrX:73040687-73040747:-	1258
						CUST_2760_PI398636433	chrX:73040801-73040861:-	1052
						CUST_1334_PI398636444	chrX:73045965-73046025:-	1673
206	XIST-003	ENSG00000229807.3	ENST00000421322.1		chrX:73040487-73046641:-	CUST_2759_PI398636433	chrX:73040687-73040747:-	1258
						CUST_2760_PI398636433	chrX:73040801-73040861:-	1052
206	XIST-005	ENSG00000229807.3	ENST00000434839.1		chrX:73040485-73046290:-	CUST_2759_PI398636433	chrX:73040687-73040747:-	1258
						CUST_2760_PI398636433	chrX:73040801-73040861:-	1052
						CUST_1334_PI398636444	chrX:73045965-73046025:-	1673
206	XIST-006	ENSG00000229807.3	ENST00000417942.1		chrX:73040490-73046136:-	CUST_2759_PI398636433	chrX:73040687-73040747:-	1258
						CUST_2760_PI398636433	chrX:73040801-73040861:-	1052
						CUST_1334_PI398636444	chrX:73045965-73046025:-	1673
207	Z83851.1-001	ENSG00000229891.1	ENST00000424852.1	yes	chr22:42760530-42765242:-	A_23_P166508	chr22:42760566-42760626:-	1052
207	Z83851.1-002	ENSG00000229891.1	ENST00000412060.1	yes	chr22:42760407-42765214:-	A_23_P166508	chr22:42760566-42760626:-	1052
207	Z83851.1-003	ENSG00000229891.1	ENST00000432473.1	yes	chr22:42760405-42765174:-	A_23_P166508	chr22:42760566-42760626:-	1052
